# Supplementary material
Source: publisher figshare collection journal article supplement (https://frontiersin.figshare.com/ndownloader/files/31653527)
Supplement: Supplementary file [file 31653527]

*Cortex Sholl Profile Analysis**The Mixed Procedure*

| Solution for Fixed Effects |     |          |      |          |                |      |         |         |       |          |         |
|----------------------------|-----|----------|------|----------|----------------|------|---------|---------|-------|----------|---------|
| Effect                     | Sex | Genotype | Dose | Estimate | Standard Error | DF   | t Value | Pr >  t | Alpha | Lower    | Upper   |
| Intercept                  |     |          |      | 1.7541   | 0.1086         | 175  | 16.16   | <.0001  | 0.05  | 1.5398   | 1.9683  |
| Sex                        | F   |          |      | 0.02807  | 0.05272        | 42E3 | 0.53    | 0.5944  | 0.05  | -0.07526 | 0.1314  |
| Sex                        | M   |          |      | 0        | .              | .    | .       | .       | .     | .        | .       |
| Genotype                   |     | CG       |      | 0.3795   | 0.1488         | 42E3 | 2.55    | 0.0107  | 0.05  | 0.08797  | 0.6711  |
| Genotype                   |     | DM       |      | 0.06451  | 0.1488         | 42E3 | 0.43    | 0.6645  | 0.05  | -0.2270  | 0.3561  |
| Genotype                   |     | RY       |      | -0.01348 | 0.1489         | 42E3 | -0.09   | 0.9279  | 0.05  | -0.3053  | 0.2784  |
| Genotype                   |     | WT       |      | 0        | .              | .    | .       | .       | .     | .        | .       |
| Dose                       |     |          | 0.1  | 0.1477   | 0.1489         | 42E3 | 0.99    | 0.3212  | 0.05  | -0.1441  | 0.4396  |
| Dose                       |     |          | 1    | 0.1035   | 0.1495         | 42E3 | 0.69    | 0.4885  | 0.05  | -0.1894  | 0.3965  |
| Dose                       |     |          | 6    | 0.2394   | 0.1491         | 42E3 | 1.61    | 0.1083  | 0.05  | -0.05278 | 0.5315  |
| Dose                       |     |          | 0    | 0        | .              | .    | .       | .       | .     | .        | .       |
| Genotype*Dose              |     | CG       | 0.1  | -0.3273  | 0.2104         | 42E3 | -1.56   | 0.1197  | 0.05  | -0.7396  | 0.08502 |
| Genotype*Dose              |     | CG       | 1    | -0.2455  | 0.2109         | 42E3 | -1.16   | 0.2443  | 0.05  | -0.6588  | 0.1678  |
| Genotype*Dose              |     | CG       | 6    | -0.6770  | 0.2107         | 42E3 | -3.21   | 0.0013  | 0.05  | -1.0900  | -0.2641 |
| Genotype*Dose              |     | CG       | 0    | 0        | .              | .    | .       | .       | .     | .        | .       |
| Genotype*Dose              |     | DM       | 0.1  | -0.2038  | 0.2105         | 42E3 | -0.97   | 0.3330  | 0.05  | -0.6163  | 0.2088  |
| Genotype*Dose              |     | DM       | 1    | 0.2928   | 0.2109         | 42E3 | 1.39    | 0.1649  | 0.05  | -0.1205  | 0.7061  |
| Genotype*Dose              |     | DM       | 6    | -0.3065  | 0.2109         | 42E3 | -1.45   | 0.1462  | 0.05  | -0.7199  | 0.1069  |
| Genotype*Dose              |     | DM       | 0    | 0        | .              | .    | .       | .       | .     | .        | .       |
| Genotype*Dose              |     | RY       | 0.1  | 0.1080   | 0.2107         | 42E3 | 0.51    | 0.6084  | 0.05  | -0.3050  | 0.5209  |
| Genotype*Dose              |     | RY       | 1    | 0.2132   | 0.2109         | 42E3 | 1.01    | 0.3121  | 0.05  | -0.2002  | 0.6265  |
| Genotype*Dose              |     | RY       | 6    | -0.1652  | 0.2112         | 42E3 | -0.78   | 0.4341  | 0.05  | -0.5791  | 0.2487  |
| Genotype*Dose              |     | RY       | 0    | 0        | .              | .    | .       | .       | .     | .        | .       |
| Genotype*Dose              |     | WT       | 0.1  | 0        | .              | .    | .       | .       | .     | .        | .       |
| Genotype*Dose              |     | WT       | 1    | 0        | .              | .    | .       | .       | .     | .        | .       |
| Genotype*Dose              |     | WT       | 6    | 0        | .              | .    | .       | .       | .     | .        | .       |
| Genotype*Dose              |     | WT       | 0    | 0        | .              | .    | .       | .       | .     | .        | .       |

*Cortex Sholl Profile Analysis**The Mixed Procedure*

| Type 3 Tests of Fixed Effects |           |           |         |        |
|-------------------------------|-----------|-----------|---------|--------|
| Effect                        | Num<br>DF | Den<br>DF | F Value | Pr > F |
| Sex                           | 1         | 42E3      | 0.28    | 0.5944 |
| Genotype                      | 3         | 42E3      | 0.31    | 0.8152 |
| Dose                          | 3         | 42E3      | 3.10    | 0.0257 |
| Genotype*Dose                 | 9         | 42E3      | 2.39    | 0.0106 |

| Least Squares Means |     |          |      |          |                   |
|---------------------|-----|----------|------|----------|-------------------|
| Effect              | Sex | Genotype | Dose | Estimate | Standard<br>Error |
| Sex                 | F   |          |      | 1.9305   | 0.03727           |
| Sex                 | M   |          |      | 1.9024   | 0.03728           |
| Genotype            |     | CG       |      | 1.9578   | 0.05262           |
| Genotype            |     | DM       |      | 1.9009   | 0.05270           |
| Genotype            |     | RY       |      | 1.9163   | 0.05278           |
| Genotype            |     | WT       |      | 1.8908   | 0.05277           |
| Dose                |     |          | 0.1  | 1.9177   | 0.05265           |
| Dose                |     |          | 1    | 2.0444   | 0.05272           |
| Dose                |     |          | 6    | 1.8279   | 0.05291           |
| Dose                |     |          | 0    | 1.8757   | 0.05259           |
| Genotype*Dose       |     | CG       | 0.1  | 1.9680   | 0.1051            |
| Genotype*Dose       |     | CG       | 1    | 2.0057   | 0.1053            |
| Genotype*Dose       |     | CG       | 6    | 1.7100   | 0.1055            |
| Genotype*Dose       |     | CG       | 0    | 2.1476   | 0.1051            |
| Genotype*Dose       |     | DM       | 0.1  | 1.7766   | 0.1053            |
| Genotype*Dose       |     | DM       | 1    | 2.2290   | 0.1053            |
| Genotype*Dose       |     | DM       | 6    | 1.7655   | 0.1060            |
| Genotype*Dose       |     | DM       | 0    | 1.8326   | 0.1051            |
| Genotype*Dose       |     | RY       | 0.1  | 2.0103   | 0.1055            |
| Genotype*Dose       |     | RY       | 1    | 2.0714   | 0.1051            |
| Genotype*Dose       |     | RY       | 6    | 1.8288   | 0.1063            |
| Genotype*Dose       |     | RY       | 0    | 1.7546   | 0.1053            |
| Genotype*Dose       |     | WT       | 0.1  | 1.9158   | 0.1053            |
| Genotype*Dose       |     | WT       | 1    | 1.8716   | 0.1061            |

*Cortex Sholl Profile Analysis**The Mixed Procedure*

| Least Squares Means |     |          |      |          |                |
|---------------------|-----|----------|------|----------|----------------|
| Effect              | Sex | Genotype | Dose | Estimate | Standard Error |
| Genotype*Dose       |     | WT       | 6    | 2.0075   | 0.1055         |
| Genotype*Dose       |     | WT       | 0    | 1.7681   | 0.1053         |

| Differences of Least Squares Means |     |          |      |     |          |      |          |                |      |         |         |
|------------------------------------|-----|----------|------|-----|----------|------|----------|----------------|------|---------|---------|
| Effect                             | Sex | Genotype | Dose | Sex | Genotype | Dose | Estimate | Standard Error | DF   | t Value | Pr >  t |
| Sex                                | F   |          |      | M   |          |      | 0.02807  | 0.05272        | 42E3 | 0.53    | 0.5944  |
| Genotype                           |     | CG       |      |     | DM       |      | 0.05691  | 0.07447        | 42E3 | 0.76    | 0.4448  |
| Genotype                           |     | CG       |      |     | RY       |      | 0.04156  | 0.07452        | 42E3 | 0.56    | 0.5770  |
| Genotype                           |     | CG       |      |     | WT       |      | 0.06707  | 0.07452        | 42E3 | 0.90    | 0.3681  |
| Genotype                           |     | DM       |      |     | RY       |      | -0.01535 | 0.07459        | 42E3 | -0.21   | 0.8370  |
| Genotype                           |     | DM       |      |     | WT       |      | 0.01016  | 0.07458        | 42E3 | 0.14    | 0.8917  |
| Genotype                           |     | RY       |      |     | WT       |      | 0.02550  | 0.07463        | 42E3 | 0.34    | 0.7326  |
| Dose                               |     |          | 0.1  |     |          | 1    | -0.1267  | 0.07451        | 42E3 | -1.70   | 0.0889  |
| Dose                               |     |          | 0.1  |     |          | 6    | 0.08974  | 0.07464        | 42E3 | 1.20    | 0.2292  |
| Dose                               |     |          | 0.1  |     |          | 0    | 0.04193  | 0.07441        | 42E3 | 0.56    | 0.5731  |
| Dose                               |     |          | 1    |     |          | 6    | 0.2165   | 0.07469        | 42E3 | 2.90    | 0.0038  |
| Dose                               |     |          | 1    |     |          | 0    | 0.1687   | 0.07447        | 42E3 | 2.26    | 0.0235  |
| Dose                               |     |          | 6    |     |          | 0    | -0.04781 | 0.07460        | 42E3 | -0.64   | 0.5216  |
| Genotype*Dose                      |     | CG       | 0.1  |     | CG       | 1    | -0.03762 | 0.1488         | 42E3 | -0.25   | 0.8003  |
| Genotype*Dose                      |     | CG       | 0.1  |     | CG       | 6    | 0.2580   | 0.1489         | 42E3 | 1.73    | 0.0831  |
| Genotype*Dose                      |     | CG       | 0.1  |     | CG       | 0    | -0.1796  | 0.1486         | 42E3 | -1.21   | 0.2268  |
| Genotype*Dose                      |     | CG       | 0.1  |     | DM       | 0.1  | 0.1915   | 0.1488         | 42E3 | 1.29    | 0.1981  |
| Genotype*Dose                      |     | CG       | 0.1  |     | DM       | 1    | -0.2610  | 0.1488         | 42E3 | -1.75   | 0.0794  |
| Genotype*Dose                      |     | CG       | 0.1  |     | DM       | 6    | 0.2026   | 0.1492         | 42E3 | 1.36    | 0.1747  |
| Genotype*Dose                      |     | CG       | 0.1  |     | DM       | 0    | 0.1354   | 0.1486         | 42E3 | 0.91    | 0.3622  |
| Genotype*Dose                      |     | CG       | 0.1  |     | RY       | 0.1  | -0.04225 | 0.1489         | 42E3 | -0.28   | 0.7766  |
| Genotype*Dose                      |     | CG       | 0.1  |     | RY       | 1    | -0.1033  | 0.1486         | 42E3 | -0.70   | 0.4869  |
| Genotype*Dose                      |     | CG       | 0.1  |     | RY       | 6    | 0.1392   | 0.1495         | 42E3 | 0.93    | 0.3515  |
| Genotype*Dose                      |     | CG       | 0.1  |     | RY       | 0    | 0.2134   | 0.1488         | 42E3 | 1.43    | 0.1514  |
| Genotype*Dose                      |     | CG       | 0.1  |     | WT       | 0.1  | 0.05222  | 0.1488         | 42E3 | 0.35    | 0.7255  |
| Genotype*Dose                      |     | CG       | 0.1  |     | WT       | 1    | 0.09639  | 0.1493         | 42E3 | 0.65    | 0.5186  |

*Cortex Sholl Profile Analysis**The Mixed Procedure*

| Differences of Least Squares Means |     |          |      |     |          |      |          |                |      |         |         |
|------------------------------------|-----|----------|------|-----|----------|------|----------|----------------|------|---------|---------|
| Effect                             | Sex | Genotype | Dose | Sex | Genotype | Dose | Estimate | Standard Error | DF   | t Value | Pr >  t |
| Genotype*Dose                      |     | CG       | 0.1  |     | WT       | 6    | -0.03944 | 0.1489         | 42E3 | -0.26   | 0.7911  |
| Genotype*Dose                      |     | CG       | 0.1  |     | WT       | 0    | 0.1999   | 0.1488         | 42E3 | 1.34    | 0.1789  |
| Genotype*Dose                      |     | CG       | 1    |     | CG       | 6    | 0.2957   | 0.1491         | 42E3 | 1.98    | 0.0473  |
| Genotype*Dose                      |     | CG       | 1    |     | CG       | 0    | -0.1420  | 0.1488         | 42E3 | -0.95   | 0.3399  |
| Genotype*Dose                      |     | CG       | 1    |     | DM       | 0.1  | 0.2291   | 0.1489         | 42E3 | 1.54    | 0.1239  |
| Genotype*Dose                      |     | CG       | 1    |     | DM       | 1    | -0.2233  | 0.1489         | 42E3 | -1.50   | 0.1336  |
| Genotype*Dose                      |     | CG       | 1    |     | DM       | 6    | 0.2402   | 0.1494         | 42E3 | 1.61    | 0.1079  |
| Genotype*Dose                      |     | CG       | 1    |     | DM       | 0    | 0.1730   | 0.1488         | 42E3 | 1.16    | 0.2447  |
| Genotype*Dose                      |     | CG       | 1    |     | RY       | 0.1  | -0.00463 | 0.1491         | 42E3 | -0.03   | 0.9752  |
| Genotype*Dose                      |     | CG       | 1    |     | RY       | 1    | -0.06569 | 0.1488         | 42E3 | -0.44   | 0.6588  |
| Genotype*Dose                      |     | CG       | 1    |     | RY       | 6    | 0.1769   | 0.1496         | 42E3 | 1.18    | 0.2372  |
| Genotype*Dose                      |     | CG       | 1    |     | RY       | 0    | 0.2510   | 0.1489         | 42E3 | 1.69    | 0.0918  |
| Genotype*Dose                      |     | CG       | 1    |     | WT       | 0.1  | 0.08984  | 0.1489         | 42E3 | 0.60    | 0.5463  |
| Genotype*Dose                      |     | CG       | 1    |     | WT       | 1    | 0.1340   | 0.1495         | 42E3 | 0.90    | 0.3699  |
| Genotype*Dose                      |     | CG       | 1    |     | WT       | 6    | -0.00182 | 0.1491         | 42E3 | -0.01   | 0.9903  |
| Genotype*Dose                      |     | CG       | 1    |     | WT       | 0    | 0.2376   | 0.1489         | 42E3 | 1.60    | 0.1106  |
| Genotype*Dose                      |     | CG       | 6    |     | CG       | 0    | -0.4376  | 0.1489         | 42E3 | -2.94   | 0.0033  |
| Genotype*Dose                      |     | CG       | 6    |     | DM       | 0.1  | -0.06658 | 0.1491         | 42E3 | -0.45   | 0.6551  |
| Genotype*Dose                      |     | CG       | 6    |     | DM       | 1    | -0.5190  | 0.1491         | 42E3 | -3.48   | 0.0005  |
| Genotype*Dose                      |     | CG       | 6    |     | DM       | 6    | -0.05549 | 0.1495         | 42E3 | -0.37   | 0.7106  |
| Genotype*Dose                      |     | CG       | 6    |     | DM       | 0    | -0.1226  | 0.1489         | 42E3 | -0.82   | 0.4102  |
| Genotype*Dose                      |     | CG       | 6    |     | RY       | 0.1  | -0.3003  | 0.1492         | 42E3 | -2.01   | 0.0442  |
| Genotype*Dose                      |     | CG       | 6    |     | RY       | 1    | -0.3614  | 0.1489         | 42E3 | -2.43   | 0.0153  |
| Genotype*Dose                      |     | CG       | 6    |     | RY       | 6    | -0.1188  | 0.1498         | 42E3 | -0.79   | 0.4276  |
| Genotype*Dose                      |     | CG       | 6    |     | RY       | 0    | -0.04464 | 0.1491         | 42E3 | -0.30   | 0.7646  |
| Genotype*Dose                      |     | CG       | 6    |     | WT       | 0.1  | -0.2058  | 0.1491         | 42E3 | -1.38   | 0.1673  |
| Genotype*Dose                      |     | CG       | 6    |     | WT       | 1    | -0.1617  | 0.1496         | 42E3 | -1.08   | 0.2799  |
| Genotype*Dose                      |     | CG       | 6    |     | WT       | 6    | -0.2975  | 0.1492         | 42E3 | -1.99   | 0.0462  |
| Genotype*Dose                      |     | CG       | 6    |     | WT       | 0    | -0.05812 | 0.1491         | 42E3 | -0.39   | 0.6966  |
| Genotype*Dose                      |     | CG       | 0    |     | DM       | 0.1  | 0.3711   | 0.1488         | 42E3 | 2.49    | 0.0126  |
| Genotype*Dose                      |     | CG       | 0    |     | DM       | 1    | -0.08137 | 0.1488         | 42E3 | -0.55   | 0.5844  |
| Genotype*Dose                      |     | CG       | 0    |     | DM       | 6    | 0.3822   | 0.1492         | 42E3 | 2.56    | 0.0105  |

*Cortex Sholl Profile Analysis**The Mixed Procedure*

| Differences of Least Squares Means |     |          |      |     |          |      |          |                |      |         |         |
|------------------------------------|-----|----------|------|-----|----------|------|----------|----------------|------|---------|---------|
| Effect                             | Sex | Genotype | Dose | Sex | Genotype | Dose | Estimate | Standard Error | DF   | t Value | Pr >  t |
| Genotype*Dose                      |     | CG       | 0    |     | DM       | 0    | 0.3150   | 0.1486         | 42E3 | 2.12    | 0.0340  |
| Genotype*Dose                      |     | CG       | 0    |     | RY       | 0.1  | 0.1373   | 0.1489         | 42E3 | 0.92    | 0.3563  |
| Genotype*Dose                      |     | CG       | 0    |     | RY       | 1    | 0.07628  | 0.1486         | 42E3 | 0.51    | 0.6078  |
| Genotype*Dose                      |     | CG       | 0    |     | RY       | 6    | 0.3188   | 0.1495         | 42E3 | 2.13    | 0.0329  |
| Genotype*Dose                      |     | CG       | 0    |     | RY       | 0    | 0.3930   | 0.1488         | 42E3 | 2.64    | 0.0082  |
| Genotype*Dose                      |     | CG       | 0    |     | WT       | 0.1  | 0.2318   | 0.1488         | 42E3 | 1.56    | 0.1191  |
| Genotype*Dose                      |     | CG       | 0    |     | WT       | 1    | 0.2760   | 0.1493         | 42E3 | 1.85    | 0.0646  |
| Genotype*Dose                      |     | CG       | 0    |     | WT       | 6    | 0.1402   | 0.1489         | 42E3 | 0.94    | 0.3466  |
| Genotype*Dose                      |     | CG       | 0    |     | WT       | 0    | 0.3795   | 0.1488         | 42E3 | 2.55    | 0.0107  |
| Genotype*Dose                      |     | DM       | 0.1  |     | DM       | 1    | -0.4524  | 0.1489         | 42E3 | -3.04   | 0.0024  |
| Genotype*Dose                      |     | DM       | 0.1  |     | DM       | 6    | 0.01109  | 0.1494         | 42E3 | 0.07    | 0.9408  |
| Genotype*Dose                      |     | DM       | 0.1  |     | DM       | 0    | -0.05605 | 0.1488         | 42E3 | -0.38   | 0.7063  |
| Genotype*Dose                      |     | DM       | 0.1  |     | RY       | 0.1  | -0.2337  | 0.1491         | 42E3 | -1.57   | 0.1169  |
| Genotype*Dose                      |     | DM       | 0.1  |     | RY       | 1    | -0.2948  | 0.1488         | 42E3 | -1.98   | 0.0476  |
| Genotype*Dose                      |     | DM       | 0.1  |     | RY       | 6    | -0.05222 | 0.1496         | 42E3 | -0.35   | 0.7271  |
| Genotype*Dose                      |     | DM       | 0.1  |     | RY       | 0    | 0.02194  | 0.1489         | 42E3 | 0.15    | 0.8828  |
| Genotype*Dose                      |     | DM       | 0.1  |     | WT       | 0.1  | -0.1392  | 0.1489         | 42E3 | -0.94   | 0.3497  |
| Genotype*Dose                      |     | DM       | 0.1  |     | WT       | 1    | -0.09508 | 0.1495         | 42E3 | -0.64   | 0.5247  |
| Genotype*Dose                      |     | DM       | 0.1  |     | WT       | 6    | -0.2309  | 0.1491         | 42E3 | -1.55   | 0.1214  |
| Genotype*Dose                      |     | DM       | 0.1  |     | WT       | 0    | 0.008462 | 0.1489         | 42E3 | 0.06    | 0.9547  |
| Genotype*Dose                      |     | DM       | 1    |     | DM       | 6    | 0.4635   | 0.1494         | 42E3 | 3.10    | 0.0019  |
| Genotype*Dose                      |     | DM       | 1    |     | DM       | 0    | 0.3964   | 0.1488         | 42E3 | 2.66    | 0.0077  |
| Genotype*Dose                      |     | DM       | 1    |     | RY       | 0.1  | 0.2187   | 0.1491         | 42E3 | 1.47    | 0.1423  |
| Genotype*Dose                      |     | DM       | 1    |     | RY       | 1    | 0.1576   | 0.1488         | 42E3 | 1.06    | 0.2893  |
| Genotype*Dose                      |     | DM       | 1    |     | RY       | 6    | 0.4002   | 0.1496         | 42E3 | 2.67    | 0.0075  |
| Genotype*Dose                      |     | DM       | 1    |     | RY       | 0    | 0.4744   | 0.1489         | 42E3 | 3.19    | 0.0014  |
| Genotype*Dose                      |     | DM       | 1    |     | WT       | 0.1  | 0.3132   | 0.1489         | 42E3 | 2.10    | 0.0354  |
| Genotype*Dose                      |     | DM       | 1    |     | WT       | 1    | 0.3574   | 0.1495         | 42E3 | 2.39    | 0.0168  |
| Genotype*Dose                      |     | DM       | 1    |     | WT       | 6    | 0.2215   | 0.1491         | 42E3 | 1.49    | 0.1372  |
| Genotype*Dose                      |     | DM       | 1    |     | WT       | 0    | 0.4609   | 0.1489         | 42E3 | 3.10    | 0.0020  |
| Genotype*Dose                      |     | DM       | 6    |     | DM       | 0    | -0.06714 | 0.1492         | 42E3 | -0.45   | 0.6528  |
| Genotype*Dose                      |     | DM       | 6    |     | RY       | 0.1  | -0.2448  | 0.1495         | 42E3 | -1.64   | 0.1016  |

*Cortex Sholl Profile Analysis**The Mixed Procedure*

| Differences of Least Squares Means |     |          |      |     |          |      |          |                |      |         |         |
|------------------------------------|-----|----------|------|-----|----------|------|----------|----------------|------|---------|---------|
| Effect                             | Sex | Genotype | Dose | Sex | Genotype | Dose | Estimate | Standard Error | DF   | t Value | Pr >  t |
| Genotype*Dose                      |     | DM       | 6    |     | RY       | 1    | -0.3059  | 0.1493         | 42E3 | -2.05   | 0.0404  |
| Genotype*Dose                      |     | DM       | 6    |     | RY       | 6    | -0.06331 | 0.1501         | 42E3 | -0.42   | 0.6732  |
| Genotype*Dose                      |     | DM       | 6    |     | RY       | 0    | 0.01085  | 0.1494         | 42E3 | 0.07    | 0.9421  |
| Genotype*Dose                      |     | DM       | 6    |     | WT       | 0.1  | -0.1503  | 0.1494         | 42E3 | -1.01   | 0.3143  |
| Genotype*Dose                      |     | DM       | 6    |     | WT       | 1    | -0.1062  | 0.1499         | 42E3 | -0.71   | 0.4789  |
| Genotype*Dose                      |     | DM       | 6    |     | WT       | 6    | -0.2420  | 0.1495         | 42E3 | -1.62   | 0.1056  |
| Genotype*Dose                      |     | DM       | 6    |     | WT       | 0    | -0.00263 | 0.1494         | 42E3 | -0.02   | 0.9860  |
| Genotype*Dose                      |     | DM       | 0    |     | RY       | 0.1  | -0.1777  | 0.1489         | 42E3 | -1.19   | 0.2328  |
| Genotype*Dose                      |     | DM       | 0    |     | RY       | 1    | -0.2387  | 0.1486         | 42E3 | -1.61   | 0.1082  |
| Genotype*Dose                      |     | DM       | 0    |     | RY       | 6    | 0.003827 | 0.1495         | 42E3 | 0.03    | 0.9796  |
| Genotype*Dose                      |     | DM       | 0    |     | RY       | 0    | 0.07799  | 0.1488         | 42E3 | 0.52    | 0.6001  |
| Genotype*Dose                      |     | DM       | 0    |     | WT       | 0.1  | -0.08320 | 0.1488         | 42E3 | -0.56   | 0.5760  |
| Genotype*Dose                      |     | DM       | 0    |     | WT       | 1    | -0.03903 | 0.1493         | 42E3 | -0.26   | 0.7938  |
| Genotype*Dose                      |     | DM       | 0    |     | WT       | 6    | -0.1749  | 0.1489         | 42E3 | -1.17   | 0.2403  |
| Genotype*Dose                      |     | DM       | 0    |     | WT       | 0    | 0.06451  | 0.1488         | 42E3 | 0.43    | 0.6645  |
| Genotype*Dose                      |     | RY       | 0.1  |     | RY       | 1    | -0.06107 | 0.1489         | 42E3 | -0.41   | 0.6818  |
| Genotype*Dose                      |     | RY       | 0.1  |     | RY       | 6    | 0.1815   | 0.1498         | 42E3 | 1.21    | 0.2256  |
| Genotype*Dose                      |     | RY       | 0.1  |     | RY       | 0    | 0.2557   | 0.1491         | 42E3 | 1.72    | 0.0863  |
| Genotype*Dose                      |     | RY       | 0.1  |     | WT       | 0.1  | 0.09447  | 0.1491         | 42E3 | 0.63    | 0.5262  |
| Genotype*Dose                      |     | RY       | 0.1  |     | WT       | 1    | 0.1386   | 0.1496         | 42E3 | 0.93    | 0.3541  |
| Genotype*Dose                      |     | RY       | 0.1  |     | WT       | 6    | 0.002810 | 0.1492         | 42E3 | 0.02    | 0.9850  |
| Genotype*Dose                      |     | RY       | 0.1  |     | WT       | 0    | 0.2422   | 0.1491         | 42E3 | 1.62    | 0.1042  |
| Genotype*Dose                      |     | RY       | 1    |     | RY       | 6    | 0.2426   | 0.1495         | 42E3 | 1.62    | 0.1047  |
| Genotype*Dose                      |     | RY       | 1    |     | RY       | 0    | 0.3167   | 0.1488         | 42E3 | 2.13    | 0.0333  |
| Genotype*Dose                      |     | RY       | 1    |     | WT       | 0.1  | 0.1555   | 0.1488         | 42E3 | 1.05    | 0.2958  |
| Genotype*Dose                      |     | RY       | 1    |     | WT       | 1    | 0.1997   | 0.1493         | 42E3 | 1.34    | 0.1811  |
| Genotype*Dose                      |     | RY       | 1    |     | WT       | 6    | 0.06388  | 0.1489         | 42E3 | 0.43    | 0.6680  |
| Genotype*Dose                      |     | RY       | 1    |     | WT       | 0    | 0.3032   | 0.1488         | 42E3 | 2.04    | 0.0415  |
| Genotype*Dose                      |     | RY       | 6    |     | RY       | 0    | 0.07416  | 0.1496         | 42E3 | 0.50    | 0.6201  |
| Genotype*Dose                      |     | RY       | 6    |     | WT       | 0.1  | -0.08702 | 0.1496         | 42E3 | -0.58   | 0.5608  |
| Genotype*Dose                      |     | RY       | 6    |     | WT       | 1    | -0.04286 | 0.1502         | 42E3 | -0.29   | 0.7754  |
| Genotype*Dose                      |     | RY       | 6    |     | WT       | 6    | -0.1787  | 0.1498         | 42E3 | -1.19   | 0.2328  |

*Cortex Sholl Profile Analysis**The Mixed Procedure*

| Differences of Least Squares Means |     |          |      |     |          |      |          |                |      |         |         |
|------------------------------------|-----|----------|------|-----|----------|------|----------|----------------|------|---------|---------|
| Effect                             | Sex | Genotype | Dose | Sex | Genotype | Dose | Estimate | Standard Error | DF   | t Value | Pr >  t |
| Genotype*Dose                      |     | RY       | 6    |     | WT       | 0    | 0.06068  | 0.1496         | 42E3 | 0.41    | 0.6850  |
| Genotype*Dose                      |     | RY       | 0    |     | WT       | 0.1  | -0.1612  | 0.1489         | 42E3 | -1.08   | 0.2790  |
| Genotype*Dose                      |     | RY       | 0    |     | WT       | 1    | -0.1170  | 0.1495         | 42E3 | -0.78   | 0.4337  |
| Genotype*Dose                      |     | RY       | 0    |     | WT       | 6    | -0.2528  | 0.1491         | 42E3 | -1.70   | 0.0898  |
| Genotype*Dose                      |     | RY       | 0    |     | WT       | 0    | -0.01348 | 0.1489         | 42E3 | -0.09   | 0.9279  |
| Genotype*Dose                      |     | WT       | 0.1  |     | WT       | 1    | 0.04417  | 0.1495         | 42E3 | 0.30    | 0.7676  |
| Genotype*Dose                      |     | WT       | 0.1  |     | WT       | 6    | -0.09166 | 0.1491         | 42E3 | -0.61   | 0.5386  |
| Genotype*Dose                      |     | WT       | 0.1  |     | WT       | 0    | 0.1477   | 0.1489         | 42E3 | 0.99    | 0.3212  |
| Genotype*Dose                      |     | WT       | 1    |     | WT       | 6    | -0.1358  | 0.1496         | 42E3 | -0.91   | 0.3640  |
| Genotype*Dose                      |     | WT       | 1    |     | WT       | 0    | 0.1035   | 0.1495         | 42E3 | 0.69    | 0.4885  |
| Genotype*Dose                      |     | WT       | 6    |     | WT       | 0    | 0.2394   | 0.1491         | 42E3 | 1.61    | 0.1083  |

**Mixed model for Peak X****The Mixed Procedure**

| Solution for Fixed Effects |     |          |      |          |                |     |         |         |       |         |         |
|----------------------------|-----|----------|------|----------|----------------|-----|---------|---------|-------|---------|---------|
| Effect                     | Sex | Genotype | Dose | Estimate | Standard Error | DF  | t Value | Pr >  t | Alpha | Lower   | Upper   |
| Intercept                  |     |          |      | 29.5272  | 0.7502         | 183 | 39.36   | <.0001  | 0.05  | 28.0471 | 31.0073 |
| Sex                        | F   |          |      | 0.1358   | 0.5313         | 184 | 0.26    | 0.7985  | 0.05  | -0.9124 | 1.1841  |
| Sex                        | M   |          |      | 0        | .              | .   | .       | .       | .     | .       | .       |
| Genotype                   |     | CG       |      | -0.08644 | 0.7508         | 183 | -0.12   | 0.9085  | 0.05  | -1.5677 | 1.3948  |
| Genotype                   |     | DM       |      | -0.9275  | 0.7520         | 185 | -1.23   | 0.2190  | 0.05  | -2.4111 | 0.5562  |
| Genotype                   |     | RY       |      | -0.8436  | 0.7524         | 185 | -1.12   | 0.2637  | 0.05  | -2.3281 | 0.6408  |
| Genotype                   |     | WT       |      | 0        | .              | .   | .       | .       | .     | .       | .       |
| Dose                       |     |          | 0.1  | 0.6976   | 0.7492         | 182 | 0.93    | 0.3530  | 0.05  | -0.7805 | 2.1758  |
| Dose                       |     |          | 1    | 1.0320   | 0.7499         | 183 | 1.38    | 0.1705  | 0.05  | -0.4476 | 2.5116  |
| Dose                       |     |          | 6    | 0.7874   | 0.7524         | 185 | 1.05    | 0.2967  | 0.05  | -0.6969 | 2.2717  |
| Dose                       |     |          | 0    | 0        | .              | .   | .       | .       | .     | .       | .       |

| Type 3 Tests of Fixed Effects |        |        |         |        |
|-------------------------------|--------|--------|---------|--------|
| Effect                        | Num DF | Den DF | F Value | Pr > F |
| Sex                           | 1      | 184    | 0.07    | 0.7985 |
| Genotype                      | 3      | 184    | 0.85    | 0.4703 |
| Dose                          | 3      | 184    | 0.70    | 0.5548 |

| Least Squares Means |     |          |      |          |                |
|---------------------|-----|----------|------|----------|----------------|
| Effect              | Sex | Genotype | Dose | Estimate | Standard Error |
| Sex                 | F   |          |      | 29.8279  | 0.3757         |
| Sex                 | M   |          |      | 29.6921  | 0.3757         |
| Genotype            |     | CG       |      | 30.1379  | 0.5297         |
| Genotype            |     | DM       |      | 29.2969  | 0.5315         |
| Genotype            |     | RY       |      | 29.3807  | 0.5321         |
| Genotype            |     | WT       |      | 30.2244  | 0.5320         |
| Dose                |     |          | 0.1  | 29.8284  | 0.5302         |
| Dose                |     |          | 1    | 30.1627  | 0.5312         |

***Mixed model for Peak X******The Mixed Procedure***

| Least Squares Means |     |          |      |          |                |
|---------------------|-----|----------|------|----------|----------------|
| Effect              | Sex | Genotype | Dose | Estimate | Standard Error |
| Dose                |     |          | 6    | 29.9181  | 0.5347         |
| Dose                |     |          | 0    | 29.1307  | 0.5293         |

| Differences of Least Squares Means |     |          |      |     |          |      |          |                |     |         |         |
|------------------------------------|-----|----------|------|-----|----------|------|----------|----------------|-----|---------|---------|
| Effect                             | Sex | Genotype | Dose | Sex | Genotype | Dose | Estimate | Standard Error | DF  | t Value | Pr >  t |
| Sex                                | F   |          |      | M   |          |      | 0.1358   | 0.5313         | 184 | 0.26    | 0.7985  |
| Genotype                           |     | CG       |      |     | DM       |      | 0.8410   | 0.7504         | 183 | 1.12    | 0.2638  |
| Genotype                           |     | CG       |      |     | RY       |      | 0.7572   | 0.7508         | 183 | 1.01    | 0.3145  |
| Genotype                           |     | CG       |      |     | WT       |      | -0.08644 | 0.7508         | 183 | -0.12   | 0.9085  |
| Genotype                           |     | DM       |      |     | RY       |      | -0.08385 | 0.7520         | 185 | -0.11   | 0.9113  |
| Genotype                           |     | DM       |      |     | WT       |      | -0.9275  | 0.7520         | 185 | -1.23   | 0.2190  |
| Genotype                           |     | RY       |      |     | WT       |      | -0.8436  | 0.7524         | 185 | -1.12   | 0.2637  |
| Dose                               |     |          | 0.1  |     |          | 1    | -0.3343  | 0.7505         | 183 | -0.45   | 0.6565  |
| Dose                               |     |          | 0.1  |     |          | 6    | -0.08977 | 0.7529         | 185 | -0.12   | 0.9052  |
| Dose                               |     |          | 0.1  |     |          | 0    | 0.6976   | 0.7492         | 182 | 0.93    | 0.3530  |
| Dose                               |     |          | 1    |     |          | 6    | 0.2446   | 0.7537         | 186 | 0.32    | 0.7459  |
| Dose                               |     |          | 1    |     |          | 0    | 1.0320   | 0.7499         | 183 | 1.38    | 0.1705  |
| Dose                               |     |          | 6    |     |          | 0    | 0.7874   | 0.7524         | 185 | 1.05    | 0.2967  |

**Mixed model for Peak Y****The Mixed Procedure**

| Solution for Fixed Effects |     |          |      |          |                |     |         |         |       |         |         |
|----------------------------|-----|----------|------|----------|----------------|-----|---------|---------|-------|---------|---------|
| Effect                     | Sex | Genotype | Dose | Estimate | Standard Error | DF  | t Value | Pr >  t | Alpha | Lower   | Upper   |
| <b>Intercept</b>           |     |          |      | 10.0810  | 0.3140         | 179 | 32.11   | <.0001  | 0.05  | 9.4614  | 10.7006 |
| <b>Sex</b>                 | F   |          |      | 0.1612   | 0.3782         | 178 | 0.43    | 0.6704  | 0.05  | -0.5851 | 0.9076  |
| <b>Sex</b>                 | M   |          |      | 0        | .              | .   | .       | .       | .     | .       | .       |
| <b>Genotype</b>            |     | CG       |      | 0.2541   | 0.2679         | 179 | 0.95    | 0.3441  | 0.05  | -0.2745 | 0.7827  |
| <b>Genotype</b>            |     | DM       |      | -0.06333 | 0.2681         | 179 | -0.24   | 0.8135  | 0.05  | -0.5924 | 0.4658  |
| <b>Genotype</b>            |     | RY       |      | 0.1256   | 0.2682         | 180 | 0.47    | 0.6401  | 0.05  | -0.4036 | 0.6549  |
| <b>Genotype</b>            |     | WT       |      | 0        | .              | .   | .       | .       | .     | .       | .       |
| <b>Dose</b>                |     |          | 0.1  | 0.2534   | 0.3784         | 178 | 0.67    | 0.5040  | 0.05  | -0.4933 | 1.0000  |
| <b>Dose</b>                |     |          | 1    | 0.4156   | 0.3784         | 178 | 1.10    | 0.2736  | 0.05  | -0.3311 | 1.1623  |
| <b>Dose</b>                |     |          | 6    | -0.1790  | 0.3795         | 180 | -0.47   | 0.6378  | 0.05  | -0.9278 | 0.5699  |
| <b>Dose</b>                |     |          | 0    | 0        | .              | .   | .       | .       | .     | .       | .       |
| <b>Sex*Dose</b>            | F   |          | 0.1  | -0.3458  | 0.5351         | 178 | -0.65   | 0.5190  | 0.05  | -1.4017 | 0.7102  |
| <b>Sex*Dose</b>            | F   |          | 1    | 0.3818   | 0.5354         | 178 | 0.71    | 0.4767  | 0.05  | -0.6748 | 1.4384  |
| <b>Sex*Dose</b>            | F   |          | 6    | -0.1059  | 0.5364         | 180 | -0.20   | 0.8437  | 0.05  | -1.1643 | 0.9525  |
| <b>Sex*Dose</b>            | F   |          | 0    | 0        | .              | .   | .       | .       | .     | .       | .       |
| <b>Sex*Dose</b>            | M   |          | 0.1  | 0        | .              | .   | .       | .       | .     | .       | .       |
| <b>Sex*Dose</b>            | M   |          | 1    | 0        | .              | .   | .       | .       | .     | .       | .       |
| <b>Sex*Dose</b>            | M   |          | 6    | 0        | .              | .   | .       | .       | .     | .       | .       |
| <b>Sex*Dose</b>            | M   |          | 0    | 0        | .              | .   | .       | .       | .     | .       | .       |

| Type 3 Tests of Fixed Effects |        |        |         |        |
|-------------------------------|--------|--------|---------|--------|
| Effect                        | Num DF | Den DF | F Value | Pr > F |
| <b>Sex</b>                    | 1      | 179    | 0.58    | 0.4492 |
| <b>Genotype</b>               | 3      | 179    | 0.55    | 0.6478 |
| <b>Dose</b>                   | 3      | 179    | 3.49    | 0.0170 |
| <b>Sex*Dose</b>               | 3      | 179    | 0.64    | 0.5906 |

*Mixed model for Peak Y**The Mixed Procedure*

| Least Squares Means |     |          |      |          |                |
|---------------------|-----|----------|------|----------|----------------|
| Effect              | Sex | Genotype | Dose | Estimate | Standard Error |
| Sex                 | F   |          |      | 10.4263  | 0.1340         |
| Sex                 | M   |          |      | 10.2826  | 0.1340         |
| Genotype            |     | CG       |      | 10.5295  | 0.1892         |
| Genotype            |     | DM       |      | 10.2120  | 0.1895         |
| Genotype            |     | RY       |      | 10.4010  | 0.1897         |
| Genotype            |     | WT       |      | 10.2754  | 0.1897         |
| Dose                |     |          | 0.1  | 10.3212  | 0.1893         |
| Dose                |     |          | 1    | 10.8472  | 0.1895         |
| Dose                |     |          | 6    | 10.0088  | 0.1902         |
| Dose                |     |          | 0    | 10.2407  | 0.1891         |

| Differences of Least Squares Means |     |          |      |     |          |      |          |                |     |         |         |
|------------------------------------|-----|----------|------|-----|----------|------|----------|----------------|-----|---------|---------|
| Effect                             | Sex | Genotype | Dose | Sex | Genotype | Dose | Estimate | Standard Error | DF  | t Value | Pr >  t |
| Sex                                | F   |          |      | M   |          |      | 0.1437   | 0.1895         | 179 | 0.76    | 0.4492  |
| Genotype                           |     | CG       |      |     | DM       |      | 0.3174   | 0.2678         | 179 | 1.19    | 0.2375  |
| Genotype                           |     | CG       |      |     | RY       |      | 0.1285   | 0.2679         | 179 | 0.48    | 0.6322  |
| Genotype                           |     | CG       |      |     | WT       |      | 0.2541   | 0.2679         | 179 | 0.95    | 0.3441  |
| Genotype                           |     | DM       |      |     | RY       |      | -0.1890  | 0.2681         | 179 | -0.70   | 0.4819  |
| Genotype                           |     | DM       |      |     | WT       |      | -0.06333 | 0.2681         | 179 | -0.24   | 0.8135  |
| Genotype                           |     | RY       |      |     | WT       |      | 0.1256   | 0.2682         | 180 | 0.47    | 0.6401  |
| Dose                               |     |          | 0.1  |     |          | 1    | -0.5260  | 0.2678         | 179 | -1.96   | 0.0511  |
| Dose                               |     |          | 0.1  |     |          | 6    | 0.3124   | 0.2683         | 180 | 1.16    | 0.2458  |
| Dose                               |     |          | 0.1  |     |          | 0    | 0.08047  | 0.2675         | 178 | 0.30    | 0.7639  |
| Dose                               |     |          | 1    |     |          | 6    | 0.8384   | 0.2685         | 180 | 3.12    | 0.0021  |
| Dose                               |     |          | 1    |     |          | 0    | 0.6065   | 0.2677         | 178 | 2.27    | 0.0247  |
| Dose                               |     |          | 6    |     |          | 0    | -0.2319  | 0.2682         | 180 | -0.86   | 0.3883  |

**Mixed model for AUC total****The Mixed Procedure**

| Solution for Fixed Effects |     |          |      |          |                |     |         |         |       |          |          |
|----------------------------|-----|----------|------|----------|----------------|-----|---------|---------|-------|----------|----------|
| Effect                     | Sex | Genotype | Dose | Estimate | Standard Error | DF  | t Value | Pr >  t | Alpha | Lower    | Upper    |
| Intercept                  |     |          |      | 509.32   | 31.6586        | 173 | 16.09   | <.0001  | 0.05  | 446.84   | 571.81   |
| Sex                        | F   |          |      | 6.7592   | 15.3727        | 173 | 0.44    | 0.6607  | 0.05  | -23.5827 | 37.1010  |
| Sex                        | M   |          |      | 0        | .              | .   | .       | .       | .     | .        | .        |
| Genotype                   |     | CG       |      | 110.11   | 43.3836        | 172 | 2.54    | 0.0120  | 0.05  | 24.4756  | 195.74   |
| Genotype                   |     | DM       |      | 15.7337  | 43.3836        | 172 | 0.36    | 0.7173  | 0.05  | -69.8994 | 101.37   |
| Genotype                   |     | RY       |      | -3.9220  | 43.4226        | 173 | -0.09   | 0.9281  | 0.05  | -89.6300 | 81.7861  |
| Genotype                   |     | WT       |      | 0        | .              | .   | .       | .       | .     | .        | .        |
| Dose                       |     |          | 0.1  | 42.8305  | 43.4226        | 173 | 0.99    | 0.3253  | 0.05  | -42.8775 | 128.54   |
| Dose                       |     |          | 1    | 29.6071  | 43.5688        | 175 | 0.68    | 0.4977  | 0.05  | -56.3826 | 115.60   |
| Dose                       |     |          | 6    | 69.5275  | 43.4619        | 173 | 1.60    | 0.1115  | 0.05  | -16.2559 | 155.31   |
| Dose                       |     |          | 0    | 0        | .              | .   | .       | .       | .     | .        | .        |
| Genotype*Dose              |     | CG       | 0.1  | -94.9139 | 61.3537        | 172 | -1.55   | 0.1237  | 0.05  | -216.02  | 26.1897  |
| Genotype*Dose              |     | CG       | 1    | -70.7806 | 61.4848        | 173 | -1.15   | 0.2512  | 0.05  | -192.14  | 50.5752  |
| Genotype*Dose              |     | CG       | 6    | -196.43  | 61.4368        | 173 | -3.20   | 0.0017  | 0.05  | -317.69  | -75.1626 |
| Genotype*Dose              |     | CG       | 0    | 0        | .              | .   | .       | .       | .     | .        | .        |
| Genotype*Dose              |     | DM       | 0.1  | -56.1459 | 61.3813        | 172 | -0.91   | 0.3616  | 0.05  | -177.30  | 65.0107  |
| Genotype*Dose              |     | DM       | 1    | 88.2543  | 61.4848        | 173 | 1.44    | 0.1530  | 0.05  | -33.1017 | 209.61   |
| Genotype*Dose              |     | DM       | 6    | -94.2500 | 61.5271        | 174 | -1.53   | 0.1274  | 0.05  | -215.69  | 27.1865  |
| Genotype*Dose              |     | DM       | 0    | 0        | .              | .   | .       | .       | .     | .        | .        |
| Genotype*Dose              |     | RY       | 0.1  | 31.3776  | 61.4366        | 173 | 0.51    | 0.6102  | 0.05  | -89.8852 | 152.64   |
| Genotype*Dose              |     | RY       | 1    | 62.2473  | 61.4892        | 173 | 1.01    | 0.3128  | 0.05  | -59.1171 | 183.61   |
| Genotype*Dose              |     | RY       | 6    | -48.0926 | 61.5686        | 174 | -0.78   | 0.4358  | 0.05  | -169.61  | 73.4242  |
| Genotype*Dose              |     | RY       | 0    | 0        | .              | .   | .       | .       | .     | .        | .        |
| Genotype*Dose              |     | WT       | 0.1  | 0        | .              | .   | .       | .       | .     | .        | .        |
| Genotype*Dose              |     | WT       | 1    | 0        | .              | .   | .       | .       | .     | .        | .        |
| Genotype*Dose              |     | WT       | 6    | 0        | .              | .   | .       | .       | .     | .        | .        |
| Genotype*Dose              |     | WT       | 0    | 0        | .              | .   | .       | .       | .     | .        | .        |

***Mixed model for AUC total******The Mixed Procedure***

| Type 3 Tests of Fixed Effects |           |           |         |        |
|-------------------------------|-----------|-----------|---------|--------|
| Effect                        | Num<br>DF | Den<br>DF | F Value | Pr > F |
| Sex                           | 1         | 173       | 0.19    | 0.6607 |
| Genotype                      | 3         | 173       | 0.36    | 0.7832 |
| Dose                          | 3         | 173       | 3.23    | 0.0239 |
| Genotype*Dose                 | 9         | 173       | 2.40    | 0.0136 |

| Least Squares Means |     |          |      |          |                   |
|---------------------|-----|----------|------|----------|-------------------|
| Effect              | Sex | Genotype | Dose | Estimate | Standard<br>Error |
| Sex                 | F   |          |      | 558.38   | 10.8703           |
| Sex                 | M   |          |      | 551.63   | 10.8702           |
| Genotype            |     | CG       |      | 567.77   | 15.3454           |
| Genotype            |     | DM       |      | 548.39   | 15.3748           |
| Genotype            |     | RY       |      | 555.66   | 15.3863           |
| Genotype            |     | WT       |      | 548.20   | 15.3850           |
| Dose                |     |          | 0.1  | 556.09   | 15.3523           |
| Dose                |     |          | 1    | 592.72   | 15.3723           |
| Dose                |     |          | 6    | 528.02   | 15.4285           |
| Dose                |     |          | 0    | 543.18   | 15.3384           |
| Genotype*Dose       |     | CG       | 0.1  | 570.73   | 30.6492           |
| Genotype*Dose       |     | CG       | 1    | 581.64   | 30.7044           |
| Genotype*Dose       |     | CG       | 6    | 495.91   | 30.7599           |
| Genotype*Dose       |     | CG       | 0    | 622.81   | 30.6492           |
| Genotype*Dose       |     | DM       | 0.1  | 515.12   | 30.7044           |
| Genotype*Dose       |     | DM       | 1    | 646.30   | 30.7044           |
| Genotype*Dose       |     | DM       | 6    | 503.71   | 30.9399           |
| Genotype*Dose       |     | DM       | 0    | 528.44   | 30.6492           |
| Genotype*Dose       |     | RY       | 0.1  | 582.99   | 30.7599           |
| Genotype*Dose       |     | RY       | 1    | 600.64   | 30.6579           |
| Genotype*Dose       |     | RY       | 6    | 530.22   | 30.9675           |
| Genotype*Dose       |     | RY       | 0    | 508.78   | 30.7044           |
| Genotype*Dose       |     | WT       | 0.1  | 555.53   | 30.7044           |
| Genotype*Dose       |     | WT       | 1    | 542.31   | 30.9108           |

*Mixed model for AUC total**The Mixed Procedure*

| Least Squares Means |     |          |      |          |                |
|---------------------|-----|----------|------|----------|----------------|
| Effect              | Sex | Genotype | Dose | Estimate | Standard Error |
| Genotype*Dose       |     | WT       | 6    | 582.23   | 30.7599        |
| Genotype*Dose       |     | WT       | 0    | 512.70   | 30.7044        |

| Differences of Least Squares Means |     |          |      |     |          |      |          |                |     |         |         |
|------------------------------------|-----|----------|------|-----|----------|------|----------|----------------|-----|---------|---------|
| Effect                             | Sex | Genotype | Dose | Sex | Genotype | Dose | Estimate | Standard Error | DF  | t Value | Pr >  t |
| Sex                                | F   |          |      | M   |          |      | 6.7592   | 15.3727        | 173 | 0.44    | 0.6607  |
| Genotype                           |     | CG       |      |     | DM       |      | 19.3804  | 21.7225        | 173 | 0.89    | 0.3735  |
| Genotype                           |     | CG       |      |     | RY       |      | 12.1176  | 21.7306        | 173 | 0.56    | 0.5778  |
| Genotype                           |     | CG       |      |     | WT       |      | 19.5787  | 21.7297        | 173 | 0.90    | 0.3688  |
| Genotype                           |     | DM       |      |     | RY       |      | -7.2628  | 21.7514        | 174 | -0.33   | 0.7389  |
| Genotype                           |     | DM       |      |     | WT       |      | 0.1983   | 21.7505        | 174 | 0.01    | 0.9927  |
| Genotype                           |     | RY       |      |     | WT       |      | 7.4611   | 21.7586        | 174 | 0.34    | 0.7321  |
| Dose                               |     |          | 0.1  |     |          | 1    | -36.6274 | 21.7255        | 173 | -1.69   | 0.0936  |
| Dose                               |     |          | 0.1  |     |          | 6    | 28.0746  | 21.7653        | 174 | 1.29    | 0.1988  |
| Dose                               |     |          | 0.1  |     |          | 0    | 12.9100  | 21.7016        | 172 | 0.59    | 0.5527  |
| Dose                               |     |          | 1    |     |          | 6    | 64.7019  | 21.7795        | 174 | 2.97    | 0.0034  |
| Dose                               |     |          | 1    |     |          | 0    | 49.5374  | 21.7157        | 173 | 2.28    | 0.0238  |
| Dose                               |     |          | 6    |     |          | 0    | -15.1646 | 21.7556        | 174 | -0.70   | 0.4867  |
| Genotype*Dose                      |     | CG       | 0.1  |     | CG       | 1    | -10.9099 | 43.3836        | 172 | -0.25   | 0.8017  |
| Genotype*Dose                      |     | CG       | 0.1  |     | CG       | 6    | 74.8148  | 43.4229        | 173 | 1.72    | 0.0867  |
| Genotype*Dose                      |     | CG       | 0.1  |     | CG       | 0    | -52.0833 | 43.3445        | 171 | -1.20   | 0.2312  |
| Genotype*Dose                      |     | CG       | 0.1  |     | DM       | 0.1  | 55.6070  | 43.3836        | 172 | 1.28    | 0.2017  |
| Genotype*Dose                      |     | CG       | 0.1  |     | DM       | 1    | -75.5697 | 43.3836        | 172 | -1.74   | 0.0833  |
| Genotype*Dose                      |     | CG       | 0.1  |     | DM       | 6    | 67.0142  | 43.5506        | 174 | 1.54    | 0.1257  |
| Genotype*Dose                      |     | CG       | 0.1  |     | DM       | 0    | 42.2917  | 43.3445        | 171 | 0.98    | 0.3306  |
| Genotype*Dose                      |     | CG       | 0.1  |     | RY       | 0.1  | -12.2608 | 43.4229        | 173 | -0.28   | 0.7780  |
| Genotype*Dose                      |     | CG       | 0.1  |     | RY       | 1    | -29.9071 | 43.3507        | 171 | -0.69   | 0.4912  |
| Genotype*Dose                      |     | CG       | 0.1  |     | RY       | 6    | 40.5124  | 43.5702        | 175 | 0.93    | 0.3537  |
| Genotype*Dose                      |     | CG       | 0.1  |     | RY       | 0    | 61.9473  | 43.3836        | 172 | 1.43    | 0.1551  |
| Genotype*Dose                      |     | CG       | 0.1  |     | WT       | 0.1  | 15.1948  | 43.3836        | 172 | 0.35    | 0.7266  |
| Genotype*Dose                      |     | CG       | 0.1  |     | WT       | 1    | 28.4183  | 43.5299        | 174 | 0.65    | 0.5147  |

*Mixed model for AUC total**The Mixed Procedure*

| Differences of Least Squares Means |     |          |      |     |          |      |          |                |     |         |         |
|------------------------------------|-----|----------|------|-----|----------|------|----------|----------------|-----|---------|---------|
| Effect                             | Sex | Genotype | Dose | Sex | Genotype | Dose | Estimate | Standard Error | DF  | t Value | Pr >  t |
| Genotype*Dose                      |     | CG       | 0.1  |     | WT       | 6    | -11.5021 | 43.4229        | 173 | -0.26   | 0.7914  |
| Genotype*Dose                      |     | CG       | 0.1  |     | WT       | 0    | 58.0253  | 43.3836        | 172 | 1.34    | 0.1828  |
| Genotype*Dose                      |     | CG       | 1    |     | CG       | 6    | 85.7247  | 43.4619        | 173 | 1.97    | 0.0502  |
| Genotype*Dose                      |     | CG       | 1    |     | CG       | 0    | -41.1735 | 43.3836        | 172 | -0.95   | 0.3439  |
| Genotype*Dose                      |     | CG       | 1    |     | DM       | 0.1  | 66.5169  | 43.4226        | 173 | 1.53    | 0.1274  |
| Genotype*Dose                      |     | CG       | 1    |     | DM       | 1    | -64.6599 | 43.4226        | 173 | -1.49   | 0.1383  |
| Genotype*Dose                      |     | CG       | 1    |     | DM       | 6    | 77.9241  | 43.5894        | 175 | 1.79    | 0.0756  |
| Genotype*Dose                      |     | CG       | 1    |     | DM       | 0    | 53.2015  | 43.3836        | 172 | 1.23    | 0.2218  |
| Genotype*Dose                      |     | CG       | 1    |     | RY       | 0.1  | -1.3510  | 43.4619        | 173 | -0.03   | 0.9752  |
| Genotype*Dose                      |     | CG       | 1    |     | RY       | 1    | -18.9972 | 43.3897        | 172 | -0.44   | 0.6621  |
| Genotype*Dose                      |     | CG       | 1    |     | RY       | 6    | 51.4223  | 43.6091        | 175 | 1.18    | 0.2399  |
| Genotype*Dose                      |     | CG       | 1    |     | RY       | 0    | 72.8572  | 43.4226        | 173 | 1.68    | 0.0952  |
| Genotype*Dose                      |     | CG       | 1    |     | WT       | 0.1  | 26.1047  | 43.4226        | 173 | 0.60    | 0.5485  |
| Genotype*Dose                      |     | CG       | 1    |     | WT       | 1    | 39.3281  | 43.5687        | 175 | 0.90    | 0.3679  |
| Genotype*Dose                      |     | CG       | 1    |     | WT       | 6    | -0.5923  | 43.4619        | 173 | -0.01   | 0.9891  |
| Genotype*Dose                      |     | CG       | 1    |     | WT       | 0    | 68.9352  | 43.4226        | 173 | 1.59    | 0.1142  |
| Genotype*Dose                      |     | CG       | 6    |     | CG       | 0    | -126.90  | 43.4229        | 173 | -2.92   | 0.0039  |
| Genotype*Dose                      |     | CG       | 6    |     | DM       | 0.1  | -19.2078 | 43.4619        | 173 | -0.44   | 0.6591  |
| Genotype*Dose                      |     | CG       | 6    |     | DM       | 1    | -150.38  | 43.4619        | 173 | -3.46   | 0.0007  |
| Genotype*Dose                      |     | CG       | 6    |     | DM       | 6    | -7.8006  | 43.6285        | 176 | -0.18   | 0.8583  |
| Genotype*Dose                      |     | CG       | 6    |     | DM       | 0    | -32.5232 | 43.4229        | 173 | -0.75   | 0.4549  |
| Genotype*Dose                      |     | CG       | 6    |     | RY       | 0.1  | -87.0757 | 43.5011        | 174 | -2.00   | 0.0469  |
| Genotype*Dose                      |     | CG       | 6    |     | RY       | 1    | -104.72  | 43.4290        | 173 | -2.41   | 0.0169  |
| Genotype*Dose                      |     | CG       | 6    |     | RY       | 6    | -34.3024 | 43.6481        | 176 | -0.79   | 0.4330  |
| Genotype*Dose                      |     | CG       | 6    |     | RY       | 0    | -12.8675 | 43.4619        | 173 | -0.30   | 0.7675  |
| Genotype*Dose                      |     | CG       | 6    |     | WT       | 0.1  | -59.6200 | 43.4619        | 173 | -1.37   | 0.1719  |
| Genotype*Dose                      |     | CG       | 6    |     | WT       | 1    | -46.3966 | 43.6079        | 175 | -1.06   | 0.2888  |
| Genotype*Dose                      |     | CG       | 6    |     | WT       | 6    | -86.3170 | 43.5011        | 174 | -1.98   | 0.0488  |
| Genotype*Dose                      |     | CG       | 6    |     | WT       | 0    | -16.7895 | 43.4619        | 173 | -0.39   | 0.6997  |
| Genotype*Dose                      |     | CG       | 0    |     | DM       | 0.1  | 107.69   | 43.3836        | 172 | 2.48    | 0.0140  |
| Genotype*Dose                      |     | CG       | 0    |     | DM       | 1    | -23.4864 | 43.3836        | 172 | -0.54   | 0.5890  |
| Genotype*Dose                      |     | CG       | 0    |     | DM       | 6    | 119.10   | 43.5506        | 174 | 2.73    | 0.0069  |

**Mixed model for AUC total****The Mixed Procedure**

| Differences of Least Squares Means |     |          |      |     |          |      |          |                |     |         |         |
|------------------------------------|-----|----------|------|-----|----------|------|----------|----------------|-----|---------|---------|
| Effect                             | Sex | Genotype | Dose | Sex | Genotype | Dose | Estimate | Standard Error | DF  | t Value | Pr >  t |
| Genotype*Dose                      |     | CG       | 0    |     | DM       | 0    | 94.3750  | 43.3445        | 171 | 2.18    | 0.0308  |
| Genotype*Dose                      |     | CG       | 0    |     | RY       | 0.1  | 39.8225  | 43.4229        | 173 | 0.92    | 0.3604  |
| Genotype*Dose                      |     | CG       | 0    |     | RY       | 1    | 22.1763  | 43.3507        | 171 | 0.51    | 0.6096  |
| Genotype*Dose                      |     | CG       | 0    |     | RY       | 6    | 92.5957  | 43.5702        | 175 | 2.13    | 0.0350  |
| Genotype*Dose                      |     | CG       | 0    |     | RY       | 0    | 114.03   | 43.3836        | 172 | 2.63    | 0.0094  |
| Genotype*Dose                      |     | CG       | 0    |     | WT       | 0.1  | 67.2782  | 43.3836        | 172 | 1.55    | 0.1228  |
| Genotype*Dose                      |     | CG       | 0    |     | WT       | 1    | 80.5016  | 43.5299        | 174 | 1.85    | 0.0661  |
| Genotype*Dose                      |     | CG       | 0    |     | WT       | 6    | 40.5812  | 43.4229        | 173 | 0.93    | 0.3513  |
| Genotype*Dose                      |     | CG       | 0    |     | WT       | 0    | 110.11   | 43.3836        | 172 | 2.54    | 0.0120  |
| Genotype*Dose                      |     | DM       | 0.1  |     | DM       | 1    | -131.18  | 43.4226        | 173 | -3.02   | 0.0029  |
| Genotype*Dose                      |     | DM       | 0.1  |     | DM       | 6    | 11.4072  | 43.5895        | 175 | 0.26    | 0.7939  |
| Genotype*Dose                      |     | DM       | 0.1  |     | DM       | 0    | -13.3153 | 43.3836        | 172 | -0.31   | 0.7593  |
| Genotype*Dose                      |     | DM       | 0.1  |     | RY       | 0.1  | -67.8678 | 43.4619        | 173 | -1.56   | 0.1202  |
| Genotype*Dose                      |     | DM       | 0.1  |     | RY       | 1    | -85.5141 | 43.3897        | 172 | -1.97   | 0.0503  |
| Genotype*Dose                      |     | DM       | 0.1  |     | RY       | 6    | -15.0946 | 43.6090        | 175 | -0.35   | 0.7297  |
| Genotype*Dose                      |     | DM       | 0.1  |     | RY       | 0    | 6.3403   | 43.4226        | 173 | 0.15    | 0.8841  |
| Genotype*Dose                      |     | DM       | 0.1  |     | WT       | 0.1  | -40.4122 | 43.4226        | 173 | -0.93   | 0.3533  |
| Genotype*Dose                      |     | DM       | 0.1  |     | WT       | 1    | -27.1887 | 43.5688        | 175 | -0.62   | 0.5334  |
| Genotype*Dose                      |     | DM       | 0.1  |     | WT       | 6    | -67.1091 | 43.4619        | 173 | -1.54   | 0.1244  |
| Genotype*Dose                      |     | DM       | 0.1  |     | WT       | 0    | 2.4183   | 43.4226        | 173 | 0.06    | 0.9557  |
| Genotype*Dose                      |     | DM       | 1    |     | DM       | 6    | 142.58   | 43.5895        | 175 | 3.27    | 0.0013  |
| Genotype*Dose                      |     | DM       | 1    |     | DM       | 0    | 117.86   | 43.3836        | 172 | 2.72    | 0.0073  |
| Genotype*Dose                      |     | DM       | 1    |     | RY       | 0.1  | 63.3089  | 43.4619        | 173 | 1.46    | 0.1470  |
| Genotype*Dose                      |     | DM       | 1    |     | RY       | 1    | 45.6627  | 43.3897        | 172 | 1.05    | 0.2941  |
| Genotype*Dose                      |     | DM       | 1    |     | RY       | 6    | 116.08   | 43.6090        | 175 | 2.66    | 0.0085  |
| Genotype*Dose                      |     | DM       | 1    |     | RY       | 0    | 137.52   | 43.4226        | 173 | 3.17    | 0.0018  |
| Genotype*Dose                      |     | DM       | 1    |     | WT       | 0.1  | 90.7645  | 43.4226        | 173 | 2.09    | 0.0381  |
| Genotype*Dose                      |     | DM       | 1    |     | WT       | 1    | 103.99   | 43.5688        | 175 | 2.39    | 0.0181  |
| Genotype*Dose                      |     | DM       | 1    |     | WT       | 6    | 64.0676  | 43.4619        | 173 | 1.47    | 0.1423  |
| Genotype*Dose                      |     | DM       | 1    |     | WT       | 0    | 133.60   | 43.4226        | 173 | 3.08    | 0.0024  |
| Genotype*Dose                      |     | DM       | 6    |     | DM       | 0    | -24.7226 | 43.5506        | 174 | -0.57   | 0.5710  |
| Genotype*Dose                      |     | DM       | 6    |     | RY       | 0.1  | -79.2751 | 43.6285        | 176 | -1.82   | 0.0709  |

*Mixed model for AUC total**The Mixed Procedure*

| Differences of Least Squares Means |     |          |      |     |          |      |          |                |     |         |         |
|------------------------------------|-----|----------|------|-----|----------|------|----------|----------------|-----|---------|---------|
| Effect                             | Sex | Genotype | Dose | Sex | Genotype | Dose | Estimate | Standard Error | DF  | t Value | Pr >  t |
| Genotype*Dose                      |     | DM       | 6    |     | RY       | 1    | -96.9213 | 43.5567        | 174 | -2.23   | 0.0274  |
| Genotype*Dose                      |     | DM       | 6    |     | RY       | 6    | -26.5018 | 43.7752        | 178 | -0.61   | 0.5457  |
| Genotype*Dose                      |     | DM       | 6    |     | RY       | 0    | -5.0669  | 43.5894        | 175 | -0.12   | 0.9076  |
| Genotype*Dose                      |     | DM       | 6    |     | WT       | 0.1  | -51.8194 | 43.5894        | 175 | -1.19   | 0.2361  |
| Genotype*Dose                      |     | DM       | 6    |     | WT       | 1    | -38.5960 | 43.7350        | 177 | -0.88   | 0.3787  |
| Genotype*Dose                      |     | DM       | 6    |     | WT       | 6    | -78.5164 | 43.6285        | 176 | -1.80   | 0.0736  |
| Genotype*Dose                      |     | DM       | 6    |     | WT       | 0    | -8.9889  | 43.5895        | 175 | -0.21   | 0.8369  |
| Genotype*Dose                      |     | DM       | 0    |     | RY       | 0.1  | -54.5525 | 43.4229        | 173 | -1.26   | 0.2107  |
| Genotype*Dose                      |     | DM       | 0    |     | RY       | 1    | -72.1987 | 43.3507        | 171 | -1.67   | 0.0976  |
| Genotype*Dose                      |     | DM       | 0    |     | RY       | 6    | -1.7793  | 43.5702        | 175 | -0.04   | 0.9675  |
| Genotype*Dose                      |     | DM       | 0    |     | RY       | 0    | 19.6557  | 43.3836        | 172 | 0.45    | 0.6511  |
| Genotype*Dose                      |     | DM       | 0    |     | WT       | 0.1  | -27.0968 | 43.3836        | 172 | -0.62   | 0.5331  |
| Genotype*Dose                      |     | DM       | 0    |     | WT       | 1    | -13.8734 | 43.5299        | 174 | -0.32   | 0.7503  |
| Genotype*Dose                      |     | DM       | 0    |     | WT       | 6    | -53.7938 | 43.4229        | 173 | -1.24   | 0.2171  |
| Genotype*Dose                      |     | DM       | 0    |     | WT       | 0    | 15.7337  | 43.3836        | 172 | 0.36    | 0.7173  |
| Genotype*Dose                      |     | RY       | 0.1  |     | RY       | 1    | -17.6463 | 43.4290        | 173 | -0.41   | 0.6850  |
| Genotype*Dose                      |     | RY       | 0.1  |     | RY       | 6    | 52.7732  | 43.6481        | 176 | 1.21    | 0.2283  |
| Genotype*Dose                      |     | RY       | 0.1  |     | RY       | 0    | 74.2081  | 43.4619        | 173 | 1.71    | 0.0895  |
| Genotype*Dose                      |     | RY       | 0.1  |     | WT       | 0.1  | 27.4556  | 43.4619        | 173 | 0.63    | 0.5284  |
| Genotype*Dose                      |     | RY       | 0.1  |     | WT       | 1    | 40.6791  | 43.6079        | 175 | 0.93    | 0.3522  |
| Genotype*Dose                      |     | RY       | 0.1  |     | WT       | 6    | 0.7587   | 43.5011        | 174 | 0.02    | 0.9861  |
| Genotype*Dose                      |     | RY       | 0.1  |     | WT       | 0    | 70.2862  | 43.4619        | 173 | 1.62    | 0.1077  |
| Genotype*Dose                      |     | RY       | 1    |     | RY       | 6    | 70.4195  | 43.5763        | 175 | 1.62    | 0.1079  |
| Genotype*Dose                      |     | RY       | 1    |     | RY       | 0    | 91.8544  | 43.3897        | 172 | 2.12    | 0.0357  |
| Genotype*Dose                      |     | RY       | 1    |     | WT       | 0.1  | 45.1019  | 43.3897        | 172 | 1.04    | 0.3001  |
| Genotype*Dose                      |     | RY       | 1    |     | WT       | 1    | 58.3253  | 43.5360        | 174 | 1.34    | 0.1821  |
| Genotype*Dose                      |     | RY       | 1    |     | WT       | 6    | 18.4050  | 43.4290        | 173 | 0.42    | 0.6722  |
| Genotype*Dose                      |     | RY       | 1    |     | WT       | 0    | 87.9324  | 43.3897        | 172 | 2.03    | 0.0443  |
| Genotype*Dose                      |     | RY       | 6    |     | RY       | 0    | 21.4349  | 43.6091        | 175 | 0.49    | 0.6237  |
| Genotype*Dose                      |     | RY       | 6    |     | WT       | 0.1  | -25.3176 | 43.6091        | 175 | -0.58   | 0.5623  |
| Genotype*Dose                      |     | RY       | 6    |     | WT       | 1    | -12.0942 | 43.7548        | 177 | -0.28   | 0.7826  |
| Genotype*Dose                      |     | RY       | 6    |     | WT       | 6    | -52.0145 | 43.6481        | 176 | -1.19   | 0.2350  |

*Mixed model for AUC total**The Mixed Procedure*

| Differences of Least Squares Means |     |          |      |     |          |      |          |                |     |         |         |
|------------------------------------|-----|----------|------|-----|----------|------|----------|----------------|-----|---------|---------|
| Effect                             | Sex | Genotype | Dose | Sex | Genotype | Dose | Estimate | Standard Error | DF  | t Value | Pr >  t |
| Genotype*Dose                      |     | RY       | 6    |     | WT       | 0    | 17.5129  | 43.6090        | 175 | 0.40    | 0.6885  |
| Genotype*Dose                      |     | RY       | 0    |     | WT       | 0.1  | -46.7525 | 43.4226        | 173 | -1.08   | 0.2831  |
| Genotype*Dose                      |     | RY       | 0    |     | WT       | 1    | -33.5291 | 43.5687        | 175 | -0.77   | 0.4426  |
| Genotype*Dose                      |     | RY       | 0    |     | WT       | 6    | -73.4494 | 43.4619        | 173 | -1.69   | 0.0928  |
| Genotype*Dose                      |     | RY       | 0    |     | WT       | 0    | -3.9220  | 43.4226        | 173 | -0.09   | 0.9281  |
| Genotype*Dose                      |     | WT       | 0.1  |     | WT       | 1    | 13.2234  | 43.5687        | 175 | 0.30    | 0.7619  |
| Genotype*Dose                      |     | WT       | 0.1  |     | WT       | 6    | -26.6969 | 43.4619        | 173 | -0.61   | 0.5398  |
| Genotype*Dose                      |     | WT       | 0.1  |     | WT       | 0    | 42.8305  | 43.4226        | 173 | 0.99    | 0.3253  |
| Genotype*Dose                      |     | WT       | 1    |     | WT       | 6    | -39.9204 | 43.6079        | 175 | -0.92   | 0.3612  |
| Genotype*Dose                      |     | WT       | 1    |     | WT       | 0    | 29.6071  | 43.5688        | 175 | 0.68    | 0.4977  |
| Genotype*Dose                      |     | WT       | 6    |     | WT       | 0    | 69.5275  | 43.4619        | 173 | 1.60    | 0.1115  |

*Mixed model for AUC proximal**The Mixed Procedure*

| Solution for Fixed Effects |     |          |      |          |                |     |         |         |       |          |          |
|----------------------------|-----|----------|------|----------|----------------|-----|---------|---------|-------|----------|----------|
| Effect                     | Sex | Genotype | Dose | Estimate | Standard Error | DF  | t Value | Pr >  t | Alpha | Lower    | Upper    |
| Intercept                  |     |          |      | 401.55   | 19.6077        | 173 | 20.48   | <.0001  | 0.05  | 362.84   | 440.25   |
| Sex                        | F   |          |      | 7.7445   | 9.5202         | 173 | 0.81    | 0.4171  | 0.05  | -11.0458 | 26.5348  |
| Sex                        | M   |          |      | 0        | .              | .   | .       | .       | .     | .        | .        |
| Genotype                   |     | CG       |      | 66.6649  | 26.8726        | 172 | 2.48    | 0.0141  | 0.05  | 13.6229  | 119.71   |
| Genotype                   |     | DM       |      | 11.7691  | 26.8726        | 172 | 0.44    | 0.6620  | 0.05  | -41.2730 | 64.8112  |
| Genotype                   |     | RY       |      | 1.3770   | 26.8944        | 173 | 0.05    | 0.9592  | 0.05  | -51.7070 | 54.4610  |
| Genotype                   |     | WT       |      | 0        | .              | .   | .       | .       | .     | .        | .        |
| Dose                       |     |          | 0.1  | 19.8136  | 26.8944        | 173 | 0.74    | 0.4623  | 0.05  | -33.2704 | 72.8976  |
| Dose                       |     |          | 1    | 20.8590  | 26.9771        | 175 | 0.77    | 0.4404  | 0.05  | -32.3843 | 74.1023  |
| Dose                       |     |          | 6    | 47.1932  | 26.9164        | 173 | 1.75    | 0.0813  | 0.05  | -5.9330  | 100.32   |
| Dose                       |     |          | 0    | 0        | .              | .   | .       | .       | .     | .        | .        |
| Genotype*Dose              |     | CG       | 0.1  | -53.7719 | 38.0036        | 172 | -1.41   | 0.1589  | 0.05  | -128.78  | 21.2409  |
| Genotype*Dose              |     | CG       | 1    | -40.7720 | 38.0775        | 173 | -1.07   | 0.2858  | 0.05  | -115.93  | 34.3832  |
| Genotype*Dose              |     | CG       | 6    | -126.04  | 38.0501        | 173 | -3.31   | 0.0011  | 0.05  | -201.14  | -50.9404 |
| Genotype*Dose              |     | CG       | 0    | 0        | .              | .   | .       | .       | .     | .        | .        |
| Genotype*Dose              |     | DM       | 0.1  | -28.8586 | 38.0190        | 172 | -0.76   | 0.4489  | 0.05  | -103.90  | 46.1840  |
| Genotype*Dose              |     | DM       | 1    | 41.2080  | 38.0776        | 173 | 1.08    | 0.2807  | 0.05  | -33.9473 | 116.36   |
| Genotype*Dose              |     | DM       | 6    | -72.2678 | 38.1007        | 174 | -1.90   | 0.0595  | 0.05  | -147.47  | 2.9316   |
| Genotype*Dose              |     | DM       | 0    | 0        | .              | .   | .       | .       | .     | .        | .        |
| Genotype*Dose              |     | RY       | 0.1  | 18.8473  | 38.0500        | 173 | 0.50    | 0.6210  | 0.05  | -56.2546 | 93.9493  |
| Genotype*Dose              |     | RY       | 1    | 37.1755  | 38.0801        | 173 | 0.98    | 0.3303  | 0.05  | -37.9847 | 112.34   |
| Genotype*Dose              |     | RY       | 6    | -35.1399 | 38.1244        | 174 | -0.92   | 0.3580  | 0.05  | -110.39  | 40.1053  |
| Genotype*Dose              |     | RY       | 0    | 0        | .              | .   | .       | .       | .     | .        | .        |
| Genotype*Dose              |     | WT       | 0.1  | 0        | .              | .   | .       | .       | .     | .        | .        |
| Genotype*Dose              |     | WT       | 1    | 0        | .              | .   | .       | .       | .     | .        | .        |
| Genotype*Dose              |     | WT       | 6    | 0        | .              | .   | .       | .       | .     | .        | .        |
| Genotype*Dose              |     | WT       | 0    | 0        | .              | .   | .       | .       | .     | .        | .        |

*Mixed model for AUC proximal**The Mixed Procedure*

| Type 3 Tests of Fixed Effects |           |           |         |        |
|-------------------------------|-----------|-----------|---------|--------|
| Effect                        | Num<br>DF | Den<br>DF | F Value | Pr > F |
| Sex                           | 1         | 173       | 0.66    | 0.4171 |
| Genotype                      | 3         | 173       | 0.48    | 0.6951 |
| Dose                          | 3         | 173       | 3.39    | 0.0193 |
| Genotype*Dose                 | 9         | 173       | 2.21    | 0.0234 |

| Least Squares Means |     |          |      |          |                   |
|---------------------|-----|----------|------|----------|-------------------|
| Effect              | Sex | Genotype | Dose | Estimate | Standard<br>Error |
| Sex                 | F   |          |      | 434.98   | 6.7318            |
| Sex                 | M   |          |      | 427.24   | 6.7318            |
| Genotype            |     | CG       |      | 438.90   | 9.5048            |
| Genotype            |     | DM       |      | 424.17   | 9.5213            |
| Genotype            |     | RY       |      | 433.98   | 9.5279            |
| Genotype            |     | WT       |      | 427.38   | 9.5271            |
| Dose                |     |          | 0.1  | 429.24   | 9.5086            |
| Dose                |     |          | 1    | 455.63   | 9.5200            |
| Dose                |     |          | 6    | 414.20   | 9.5515            |
| Dose                |     |          | 0    | 425.37   | 9.5009            |
| Genotype*Dose       |     | CG       | 0.1  | 438.13   | 18.9863           |
| Genotype*Dose       |     | CG       | 1    | 452.17   | 19.0172           |
| Genotype*Dose       |     | CG       | 6    | 393.23   | 19.0483           |
| Genotype*Dose       |     | CG       | 0    | 472.08   | 18.9863           |
| Genotype*Dose       |     | DM       | 0.1  | 408.14   | 19.0172           |
| Genotype*Dose       |     | DM       | 1    | 479.25   | 19.0172           |
| Genotype*Dose       |     | DM       | 6    | 392.11   | 19.1492           |
| Genotype*Dose       |     | DM       | 0    | 417.19   | 18.9863           |
| Genotype*Dose       |     | RY       | 0.1  | 445.46   | 19.0483           |
| Genotype*Dose       |     | RY       | 1    | 464.83   | 18.9914           |
| Genotype*Dose       |     | RY       | 6    | 418.85   | 19.1657           |
| Genotype*Dose       |     | RY       | 0    | 406.80   | 19.0172           |
| Genotype*Dose       |     | WT       | 0.1  | 425.23   | 19.0172           |
| Genotype*Dose       |     | WT       | 1    | 426.28   | 19.1340           |

*Mixed model for AUC proximal**The Mixed Procedure*

| Least Squares Means |     |          |      |          |                |
|---------------------|-----|----------|------|----------|----------------|
| Effect              | Sex | Genotype | Dose | Estimate | Standard Error |
| Genotype*Dose       |     | WT       | 6    | 452.61   | 19.0483        |
| Genotype*Dose       |     | WT       | 0    | 405.42   | 19.0172        |

| Differences of Least Squares Means |     |          |      |     |          |      |          |                |     |         |         |
|------------------------------------|-----|----------|------|-----|----------|------|----------|----------------|-----|---------|---------|
| Effect                             | Sex | Genotype | Dose | Sex | Genotype | Dose | Estimate | Standard Error | DF  | t Value | Pr >  t |
| Sex                                | F   |          |      | M   |          |      | 7.7445   | 9.5202         | 173 | 0.81    | 0.4171  |
| Genotype                           |     | CG       |      |     | DM       |      | 14.7288  | 13.4535        | 173 | 1.09    | 0.2751  |
| Genotype                           |     | CG       |      |     | RY       |      | 4.9206   | 13.4581        | 173 | 0.37    | 0.7151  |
| Genotype                           |     | CG       |      |     | WT       |      | 11.5183  | 13.4576        | 173 | 0.86    | 0.3932  |
| Genotype                           |     | DM       |      |     | RY       |      | -9.8082  | 13.4698        | 174 | -0.73   | 0.4675  |
| Genotype                           |     | DM       |      |     | WT       |      | -3.2105  | 13.4693        | 174 | -0.24   | 0.8119  |
| Genotype                           |     | RY       |      |     | WT       |      | 6.5978   | 13.4739        | 174 | 0.49    | 0.6250  |
| Dose                               |     |          | 0.1  |     |          | 1    | -26.3940 | 13.4553        | 173 | -1.96   | 0.0514  |
| Dose                               |     |          | 0.1  |     |          | 6    | 15.0372  | 13.4776        | 174 | 1.12    | 0.2661  |
| Dose                               |     |          | 0.1  |     |          | 0    | 3.8678   | 13.4418        | 172 | 0.29    | 0.7739  |
| Dose                               |     |          | 1    |     |          | 6    | 41.4312  | 13.4856        | 175 | 3.07    | 0.0025  |
| Dose                               |     |          | 1    |     |          | 0    | 30.2619  | 13.4498        | 173 | 2.25    | 0.0257  |
| Dose                               |     |          | 6    |     |          | 0    | -11.1694 | 13.4721        | 174 | -0.83   | 0.4082  |
| Genotype*Dose                      |     | CG       | 0.1  |     | CG       | 1    | -14.0453 | 26.8726        | 172 | -0.52   | 0.6019  |
| Genotype*Dose                      |     | CG       | 0.1  |     | CG       | 6    | 44.8911  | 26.8945        | 173 | 1.67    | 0.0969  |
| Genotype*Dose                      |     | CG       | 0.1  |     | CG       | 0    | -33.9583 | 26.8507        | 172 | -1.26   | 0.2077  |
| Genotype*Dose                      |     | CG       | 0.1  |     | DM       | 0.1  | 29.9825  | 26.8726        | 172 | 1.12    | 0.2661  |
| Genotype*Dose                      |     | CG       | 0.1  |     | DM       | 1    | -41.1295 | 26.8726        | 172 | -1.53   | 0.1277  |
| Genotype*Dose                      |     | CG       | 0.1  |     | DM       | 6    | 46.0121  | 26.9661        | 174 | 1.71    | 0.0897  |
| Genotype*Dose                      |     | CG       | 0.1  |     | DM       | 0    | 20.9375  | 26.8507        | 172 | 0.78    | 0.4366  |
| Genotype*Dose                      |     | CG       | 0.1  |     | RY       | 0.1  | -7.3313  | 26.8945        | 173 | -0.27   | 0.7855  |
| Genotype*Dose                      |     | CG       | 0.1  |     | RY       | 1    | -26.7049 | 26.8543        | 172 | -0.99   | 0.3214  |
| Genotype*Dose                      |     | CG       | 0.1  |     | RY       | 6    | 19.2763  | 26.9778        | 175 | 0.71    | 0.4759  |
| Genotype*Dose                      |     | CG       | 0.1  |     | RY       | 0    | 31.3296  | 26.8726        | 172 | 1.17    | 0.2453  |
| Genotype*Dose                      |     | CG       | 0.1  |     | WT       | 0.1  | 12.8930  | 26.8726        | 172 | 0.48    | 0.6320  |
| Genotype*Dose                      |     | CG       | 0.1  |     | WT       | 1    | 11.8476  | 26.9553        | 174 | 0.44    | 0.6608  |

*Mixed model for AUC proximal**The Mixed Procedure*

| Differences of Least Squares Means |     |          |      |     |          |      |          |                |     |         |         |
|------------------------------------|-----|----------|------|-----|----------|------|----------|----------------|-----|---------|---------|
| Effect                             | Sex | Genotype | Dose | Sex | Genotype | Dose | Estimate | Standard Error | DF  | t Value | Pr >  t |
| Genotype*Dose                      |     | CG       | 0.1  |     | WT       | 6    | -14.4866 | 26.8945        | 173 | -0.54   | 0.5908  |
| Genotype*Dose                      |     | CG       | 0.1  |     | WT       | 0    | 32.7066  | 26.8726        | 172 | 1.22    | 0.2252  |
| Genotype*Dose                      |     | CG       | 1    |     | CG       | 6    | 58.9364  | 26.9164        | 173 | 2.19    | 0.0299  |
| Genotype*Dose                      |     | CG       | 1    |     | CG       | 0    | -19.9130 | 26.8726        | 172 | -0.74   | 0.4597  |
| Genotype*Dose                      |     | CG       | 1    |     | DM       | 0.1  | 44.0278  | 26.8944        | 173 | 1.64    | 0.1034  |
| Genotype*Dose                      |     | CG       | 1    |     | DM       | 1    | -27.0842 | 26.8944        | 173 | -1.01   | 0.3153  |
| Genotype*Dose                      |     | CG       | 1    |     | DM       | 6    | 60.0574  | 26.9879        | 175 | 2.23    | 0.0273  |
| Genotype*Dose                      |     | CG       | 1    |     | DM       | 0    | 34.9828  | 26.8726        | 172 | 1.30    | 0.1947  |
| Genotype*Dose                      |     | CG       | 1    |     | RY       | 0.1  | 6.7140   | 26.9164        | 173 | 0.25    | 0.8033  |
| Genotype*Dose                      |     | CG       | 1    |     | RY       | 1    | -12.6596 | 26.8761        | 172 | -0.47   | 0.6382  |
| Genotype*Dose                      |     | CG       | 1    |     | RY       | 6    | 33.3216  | 26.9996        | 175 | 1.23    | 0.2188  |
| Genotype*Dose                      |     | CG       | 1    |     | RY       | 0    | 45.3749  | 26.8944        | 173 | 1.69    | 0.0934  |
| Genotype*Dose                      |     | CG       | 1    |     | WT       | 0.1  | 26.9383  | 26.8944        | 173 | 1.00    | 0.3179  |
| Genotype*Dose                      |     | CG       | 1    |     | WT       | 1    | 25.8929  | 26.9771        | 175 | 0.96    | 0.3385  |
| Genotype*Dose                      |     | CG       | 1    |     | WT       | 6    | -0.4413  | 26.9164        | 173 | -0.02   | 0.9869  |
| Genotype*Dose                      |     | CG       | 1    |     | WT       | 0    | 46.7519  | 26.8944        | 173 | 1.74    | 0.0839  |
| Genotype*Dose                      |     | CG       | 6    |     | CG       | 0    | -78.8494 | 26.8945        | 173 | -2.93   | 0.0038  |
| Genotype*Dose                      |     | CG       | 6    |     | DM       | 0.1  | -14.9086 | 26.9164        | 173 | -0.55   | 0.5804  |
| Genotype*Dose                      |     | CG       | 6    |     | DM       | 1    | -86.0206 | 26.9164        | 173 | -3.20   | 0.0017  |
| Genotype*Dose                      |     | CG       | 6    |     | DM       | 6    | 1.1210   | 27.0098        | 176 | 0.04    | 0.9669  |
| Genotype*Dose                      |     | CG       | 6    |     | DM       | 0    | -23.9536 | 26.8945        | 173 | -0.89   | 0.3744  |
| Genotype*Dose                      |     | CG       | 6    |     | RY       | 0.1  | -52.2224 | 26.9383        | 174 | -1.94   | 0.0542  |
| Genotype*Dose                      |     | CG       | 6    |     | RY       | 1    | -71.5959 | 26.8981        | 173 | -2.66   | 0.0085  |
| Genotype*Dose                      |     | CG       | 6    |     | RY       | 6    | -25.6148 | 27.0215        | 176 | -0.95   | 0.3445  |
| Genotype*Dose                      |     | CG       | 6    |     | RY       | 0    | -13.5615 | 26.9164        | 173 | -0.50   | 0.6150  |
| Genotype*Dose                      |     | CG       | 6    |     | WT       | 0.1  | -31.9981 | 26.9164        | 173 | -1.19   | 0.2361  |
| Genotype*Dose                      |     | CG       | 6    |     | WT       | 1    | -33.0435 | 26.9990        | 175 | -1.22   | 0.2226  |
| Genotype*Dose                      |     | CG       | 6    |     | WT       | 6    | -59.3776 | 26.9383        | 174 | -2.20   | 0.0288  |
| Genotype*Dose                      |     | CG       | 6    |     | WT       | 0    | -12.1845 | 26.9164        | 173 | -0.45   | 0.6513  |
| Genotype*Dose                      |     | CG       | 0    |     | DM       | 0.1  | 63.9408  | 26.8726        | 172 | 2.38    | 0.0184  |
| Genotype*Dose                      |     | CG       | 0    |     | DM       | 1    | -7.1712  | 26.8726        | 172 | -0.27   | 0.7899  |
| Genotype*Dose                      |     | CG       | 0    |     | DM       | 6    | 79.9704  | 26.9661        | 174 | 2.97    | 0.0034  |

*Mixed model for AUC proximal**The Mixed Procedure*

| Differences of Least Squares Means |     |          |      |     |          |      |          |                |     |         |         |
|------------------------------------|-----|----------|------|-----|----------|------|----------|----------------|-----|---------|---------|
| Effect                             | Sex | Genotype | Dose | Sex | Genotype | Dose | Estimate | Standard Error | DF  | t Value | Pr >  t |
| Genotype*Dose                      |     | CG       | 0    |     | DM       | 0    | 54.8958  | 26.8507        | 172 | 2.04    | 0.0424  |
| Genotype*Dose                      |     | CG       | 0    |     | RY       | 0.1  | 26.6270  | 26.8945        | 173 | 0.99    | 0.3235  |
| Genotype*Dose                      |     | CG       | 0    |     | RY       | 1    | 7.2535   | 26.8543        | 172 | 0.27    | 0.7874  |
| Genotype*Dose                      |     | CG       | 0    |     | RY       | 6    | 53.2346  | 26.9778        | 175 | 1.97    | 0.0500  |
| Genotype*Dose                      |     | CG       | 0    |     | RY       | 0    | 65.2879  | 26.8726        | 172 | 2.43    | 0.0161  |
| Genotype*Dose                      |     | CG       | 0    |     | WT       | 0.1  | 46.8513  | 26.8726        | 172 | 1.74    | 0.0830  |
| Genotype*Dose                      |     | CG       | 0    |     | WT       | 1    | 45.8059  | 26.9553        | 174 | 1.70    | 0.0910  |
| Genotype*Dose                      |     | CG       | 0    |     | WT       | 6    | 19.4718  | 26.8945        | 173 | 0.72    | 0.4700  |
| Genotype*Dose                      |     | CG       | 0    |     | WT       | 0    | 66.6649  | 26.8726        | 172 | 2.48    | 0.0141  |
| Genotype*Dose                      |     | DM       | 0.1  |     | DM       | 1    | -71.1120 | 26.8944        | 173 | -2.64   | 0.0089  |
| Genotype*Dose                      |     | DM       | 0.1  |     | DM       | 6    | 16.0296  | 26.9879        | 175 | 0.59    | 0.5533  |
| Genotype*Dose                      |     | DM       | 0.1  |     | DM       | 0    | -9.0450  | 26.8726        | 172 | -0.34   | 0.7368  |
| Genotype*Dose                      |     | DM       | 0.1  |     | RY       | 0.1  | -37.3138 | 26.9164        | 173 | -1.39   | 0.1674  |
| Genotype*Dose                      |     | DM       | 0.1  |     | RY       | 1    | -56.6873 | 26.8761        | 172 | -2.11   | 0.0364  |
| Genotype*Dose                      |     | DM       | 0.1  |     | RY       | 6    | -10.7062 | 26.9995        | 175 | -0.40   | 0.6922  |
| Genotype*Dose                      |     | DM       | 0.1  |     | RY       | 0    | 1.3471   | 26.8944        | 173 | 0.05    | 0.9601  |
| Genotype*Dose                      |     | DM       | 0.1  |     | WT       | 0.1  | -17.0895 | 26.8944        | 173 | -0.64   | 0.5260  |
| Genotype*Dose                      |     | DM       | 0.1  |     | WT       | 1    | -18.1349 | 26.9771        | 175 | -0.67   | 0.5023  |
| Genotype*Dose                      |     | DM       | 0.1  |     | WT       | 6    | -44.4690 | 26.9164        | 173 | -1.65   | 0.1003  |
| Genotype*Dose                      |     | DM       | 0.1  |     | WT       | 0    | 2.7241   | 26.8944        | 173 | 0.10    | 0.9194  |
| Genotype*Dose                      |     | DM       | 1    |     | DM       | 6    | 87.1416  | 26.9879        | 175 | 3.23    | 0.0015  |
| Genotype*Dose                      |     | DM       | 1    |     | DM       | 0    | 62.0670  | 26.8726        | 172 | 2.31    | 0.0221  |
| Genotype*Dose                      |     | DM       | 1    |     | RY       | 0.1  | 33.7981  | 26.9164        | 173 | 1.26    | 0.2109  |
| Genotype*Dose                      |     | DM       | 1    |     | RY       | 1    | 14.4246  | 26.8761        | 172 | 0.54    | 0.5922  |
| Genotype*Dose                      |     | DM       | 1    |     | RY       | 6    | 60.4058  | 26.9995        | 175 | 2.24    | 0.0265  |
| Genotype*Dose                      |     | DM       | 1    |     | RY       | 0    | 72.4591  | 26.8944        | 173 | 2.69    | 0.0078  |
| Genotype*Dose                      |     | DM       | 1    |     | WT       | 0.1  | 54.0225  | 26.8944        | 173 | 2.01    | 0.0461  |
| Genotype*Dose                      |     | DM       | 1    |     | WT       | 1    | 52.9771  | 26.9771        | 175 | 1.96    | 0.0511  |
| Genotype*Dose                      |     | DM       | 1    |     | WT       | 6    | 26.6429  | 26.9164        | 173 | 0.99    | 0.3236  |
| Genotype*Dose                      |     | DM       | 1    |     | WT       | 0    | 73.8361  | 26.8944        | 173 | 2.75    | 0.0067  |
| Genotype*Dose                      |     | DM       | 6    |     | DM       | 0    | -25.0746 | 26.9661        | 174 | -0.93   | 0.3537  |
| Genotype*Dose                      |     | DM       | 6    |     | RY       | 0.1  | -53.3435 | 27.0098        | 176 | -1.97   | 0.0498  |

*Mixed model for AUC proximal**The Mixed Procedure*

| Differences of Least Squares Means |     |          |      |     |          |      |          |                |     |         |         |
|------------------------------------|-----|----------|------|-----|----------|------|----------|----------------|-----|---------|---------|
| Effect                             | Sex | Genotype | Dose | Sex | Genotype | Dose | Estimate | Standard Error | DF  | t Value | Pr >  t |
| Genotype*Dose                      |     | DM       | 6    |     | RY       | 1    | -72.7170 | 26.9697        | 175 | -2.70   | 0.0077  |
| Genotype*Dose                      |     | DM       | 6    |     | RY       | 6    | -26.7358 | 27.0928        | 177 | -0.99   | 0.3251  |
| Genotype*Dose                      |     | DM       | 6    |     | RY       | 0    | -14.6825 | 26.9879        | 175 | -0.54   | 0.5871  |
| Genotype*Dose                      |     | DM       | 6    |     | WT       | 0.1  | -33.1191 | 26.9879        | 175 | -1.23   | 0.2214  |
| Genotype*Dose                      |     | DM       | 6    |     | WT       | 1    | -34.1645 | 27.0703        | 177 | -1.26   | 0.2086  |
| Genotype*Dose                      |     | DM       | 6    |     | WT       | 6    | -60.4987 | 27.0098        | 176 | -2.24   | 0.0264  |
| Genotype*Dose                      |     | DM       | 6    |     | WT       | 0    | -13.3055 | 26.9879        | 175 | -0.49   | 0.6226  |
| Genotype*Dose                      |     | DM       | 0    |     | RY       | 0.1  | -28.2688 | 26.8945        | 173 | -1.05   | 0.2947  |
| Genotype*Dose                      |     | DM       | 0    |     | RY       | 1    | -47.6424 | 26.8543        | 172 | -1.77   | 0.0778  |
| Genotype*Dose                      |     | DM       | 0    |     | RY       | 6    | -1.6612  | 26.9778        | 175 | -0.06   | 0.9510  |
| Genotype*Dose                      |     | DM       | 0    |     | RY       | 0    | 10.3921  | 26.8726        | 172 | 0.39    | 0.6994  |
| Genotype*Dose                      |     | DM       | 0    |     | WT       | 0.1  | -8.0445  | 26.8726        | 172 | -0.30   | 0.7650  |
| Genotype*Dose                      |     | DM       | 0    |     | WT       | 1    | -9.0899  | 26.9553        | 174 | -0.34   | 0.7364  |
| Genotype*Dose                      |     | DM       | 0    |     | WT       | 6    | -35.4241 | 26.8945        | 173 | -1.32   | 0.1895  |
| Genotype*Dose                      |     | DM       | 0    |     | WT       | 0    | 11.7691  | 26.8726        | 172 | 0.44    | 0.6620  |
| Genotype*Dose                      |     | RY       | 0.1  |     | RY       | 1    | -19.3735 | 26.8981        | 173 | -0.72   | 0.4723  |
| Genotype*Dose                      |     | RY       | 0.1  |     | RY       | 6    | 26.6076  | 27.0215        | 176 | 0.98    | 0.3261  |
| Genotype*Dose                      |     | RY       | 0.1  |     | RY       | 0    | 38.6609  | 26.9164        | 173 | 1.44    | 0.1527  |
| Genotype*Dose                      |     | RY       | 0.1  |     | WT       | 0.1  | 20.2243  | 26.9164        | 173 | 0.75    | 0.4534  |
| Genotype*Dose                      |     | RY       | 0.1  |     | WT       | 1    | 19.1789  | 26.9990        | 175 | 0.71    | 0.4784  |
| Genotype*Dose                      |     | RY       | 0.1  |     | WT       | 6    | -7.1552  | 26.9383        | 174 | -0.27   | 0.7909  |
| Genotype*Dose                      |     | RY       | 0.1  |     | WT       | 0    | 40.0379  | 26.9164        | 173 | 1.49    | 0.1387  |
| Genotype*Dose                      |     | RY       | 1    |     | RY       | 6    | 45.9812  | 26.9814        | 175 | 1.70    | 0.0901  |
| Genotype*Dose                      |     | RY       | 1    |     | RY       | 0    | 58.0345  | 26.8761        | 172 | 2.16    | 0.0322  |
| Genotype*Dose                      |     | RY       | 1    |     | WT       | 0.1  | 39.5979  | 26.8761        | 172 | 1.47    | 0.1425  |
| Genotype*Dose                      |     | RY       | 1    |     | WT       | 1    | 38.5525  | 26.9589        | 174 | 1.43    | 0.1545  |
| Genotype*Dose                      |     | RY       | 1    |     | WT       | 6    | 12.2183  | 26.8981        | 173 | 0.45    | 0.6502  |
| Genotype*Dose                      |     | RY       | 1    |     | WT       | 0    | 59.4115  | 26.8761        | 172 | 2.21    | 0.0284  |
| Genotype*Dose                      |     | RY       | 6    |     | RY       | 0    | 12.0533  | 26.9996        | 175 | 0.45    | 0.6558  |
| Genotype*Dose                      |     | RY       | 6    |     | WT       | 0.1  | -6.3833  | 26.9996        | 175 | -0.24   | 0.8134  |
| Genotype*Dose                      |     | RY       | 6    |     | WT       | 1    | -7.4287  | 27.0820        | 177 | -0.27   | 0.7842  |
| Genotype*Dose                      |     | RY       | 6    |     | WT       | 6    | -33.7628 | 27.0215        | 176 | -1.25   | 0.2132  |

***Mixed model for AUC proximal******The Mixed Procedure***

| Differences of Least Squares Means |     |          |      |     |          |      |          |                |     |         |         |
|------------------------------------|-----|----------|------|-----|----------|------|----------|----------------|-----|---------|---------|
| Effect                             | Sex | Genotype | Dose | Sex | Genotype | Dose | Estimate | Standard Error | DF  | t Value | Pr >  t |
| Genotype*Dose                      |     | RY       | 6    |     | WT       | 0    | 13.4303  | 26.9995        | 175 | 0.50    | 0.6195  |
| Genotype*Dose                      |     | RY       | 0    |     | WT       | 0.1  | -18.4366 | 26.8944        | 173 | -0.69   | 0.4939  |
| Genotype*Dose                      |     | RY       | 0    |     | WT       | 1    | -19.4820 | 26.9771        | 175 | -0.72   | 0.4712  |
| Genotype*Dose                      |     | RY       | 0    |     | WT       | 6    | -45.8161 | 26.9164        | 173 | -1.70   | 0.0905  |
| Genotype*Dose                      |     | RY       | 0    |     | WT       | 0    | 1.3770   | 26.8944        | 173 | 0.05    | 0.9592  |
| Genotype*Dose                      |     | WT       | 0.1  |     | WT       | 1    | -1.0454  | 26.9771        | 175 | -0.04   | 0.9691  |
| Genotype*Dose                      |     | WT       | 0.1  |     | WT       | 6    | -27.3796 | 26.9164        | 173 | -1.02   | 0.3105  |
| Genotype*Dose                      |     | WT       | 0.1  |     | WT       | 0    | 19.8136  | 26.8944        | 173 | 0.74    | 0.4623  |
| Genotype*Dose                      |     | WT       | 1    |     | WT       | 6    | -26.3342 | 26.9990        | 175 | -0.98   | 0.3307  |
| Genotype*Dose                      |     | WT       | 1    |     | WT       | 0    | 20.8590  | 26.9771        | 175 | 0.77    | 0.4404  |
| Genotype*Dose                      |     | WT       | 6    |     | WT       | 0    | 47.1932  | 26.9164        | 173 | 1.75    | 0.0813  |

*Mixed model for AUC distal**The Mixed Procedure*

| Solution for Fixed Effects |     |          |      |          |                |     |         |         |       |          |          |
|----------------------------|-----|----------|------|----------|----------------|-----|---------|---------|-------|----------|----------|
| Effect                     | Sex | Genotype | Dose | Estimate | Standard Error | DF  | t Value | Pr >  t | Alpha | Lower    | Upper    |
| Intercept                  |     |          |      | 1.6447   | 0.06079        | 171 | 27.05   | <.0001  | 0.05  | 1.5247   | 1.7647   |
| Sex                        | F   |          |      | 0.02811  | 0.02953        | 171 | 0.95    | 0.3425  | 0.05  | -0.03018 | 0.08640  |
| Sex                        | M   |          |      | 0        | .              | .   | .       | .       | .     | .        | .        |
| Genotype                   |     | CG       |      | 0.1772   | 0.08327        | 169 | 2.13    | 0.0348  | 0.05  | 0.01282  | 0.3416   |
| Genotype                   |     | DM       |      | 0.01628  | 0.08327        | 169 | 0.20    | 0.8452  | 0.05  | -0.1481  | 0.1807   |
| Genotype                   |     | RY       |      | -0.00320 | 0.08337        | 170 | -0.04   | 0.9694  | 0.05  | -0.1678  | 0.1614   |
| Genotype                   |     | WT       |      | 0        | .              | .   | .       | .       | .     | .        | .        |
| Dose                       |     |          | 0.1  | 0.1052   | 0.08337        | 170 | 1.26    | 0.2089  | 0.05  | -0.05940 | 0.2698   |
| Dose                       |     |          | 1    | -0.00309 | 0.08376        | 173 | -0.04   | 0.9706  | 0.05  | -0.1684  | 0.1622   |
| Dose                       |     |          | 6    | 0.1088   | 0.08348        | 171 | 1.30    | 0.1942  | 0.05  | -0.05597 | 0.2736   |
| Dose                       |     |          | 0    | 0        | .              | .   | .       | .       | .     | .        | .        |
| Genotype*Dose              |     | CG       | 0.1  | -0.1809  | 0.1178         | 169 | -1.54   | 0.1264  | 0.05  | -0.4133  | 0.05159  |
| Genotype*Dose              |     | CG       | 1    | -0.05611 | 0.1181         | 171 | -0.48   | 0.6353  | 0.05  | -0.2892  | 0.1770   |
| Genotype*Dose              |     | CG       | 6    | -0.2947  | 0.1180         | 171 | -2.50   | 0.0135  | 0.05  | -0.5276  | -0.06177 |
| Genotype*Dose              |     | CG       | 0    | 0        | .              | .   | .       | .       | .     | .        | .        |
| Genotype*Dose              |     | DM       | 0.1  | -0.1123  | 0.1178         | 170 | -0.95   | 0.3421  | 0.05  | -0.3449  | 0.1203   |
| Genotype*Dose              |     | DM       | 1    | 0.1924   | 0.1181         | 171 | 1.63    | 0.1052  | 0.05  | -0.04076 | 0.4255   |
| Genotype*Dose              |     | DM       | 6    | -0.1129  | 0.1182         | 172 | -0.96   | 0.3409  | 0.05  | -0.3463  | 0.1205   |
| Genotype*Dose              |     | DM       | 0    | 0        | .              | .   | .       | .       | .     | .        | .        |
| Genotype*Dose              |     | RY       | 0.1  | 0.04504  | 0.1180         | 171 | 0.38    | 0.7031  | 0.05  | -0.1879  | 0.2779   |
| Genotype*Dose              |     | RY       | 1    | 0.1175   | 0.1181         | 171 | 1.00    | 0.3211  | 0.05  | -0.1156  | 0.3507   |
| Genotype*Dose              |     | RY       | 6    | -0.06624 | 0.1183         | 172 | -0.56   | 0.5764  | 0.05  | -0.2998  | 0.1673   |
| Genotype*Dose              |     | RY       | 0    | 0        | .              | .   | .       | .       | .     | .        | .        |
| Genotype*Dose              |     | WT       | 0.1  | 0        | .              | .   | .       | .       | .     | .        | .        |
| Genotype*Dose              |     | WT       | 1    | 0        | .              | .   | .       | .       | .     | .        | .        |
| Genotype*Dose              |     | WT       | 6    | 0        | .              | .   | .       | .       | .     | .        | .        |
| Genotype*Dose              |     | WT       | 0    | 0        | .              | .   | .       | .       | .     | .        | .        |

*Mixed model for AUC distal**The Mixed Procedure*

| Type 3 Tests of Fixed Effects |           |           |         |        |
|-------------------------------|-----------|-----------|---------|--------|
| Effect                        | Num<br>DF | Den<br>DF | F Value | Pr > F |
| Sex                           | 1         | 171       | 0.91    | 0.3425 |
| Genotype                      | 3         | 171       | 0.43    | 0.7321 |
| Dose                          | 3         | 171       | 1.30    | 0.2777 |
| Genotype*Dose                 | 9         | 171       | 1.85    | 0.0623 |

| Least Squares Means |     |          |      |          |                   |
|---------------------|-----|----------|------|----------|-------------------|
| Effect              | Sex | Genotype | Dose | Estimate | Standard<br>Error |
| Sex                 | F   |          |      | 1.7438   | 0.02088           |
| Sex                 | M   |          |      | 1.7157   | 0.02088           |
| Genotype            |     | CG       |      | 1.7558   | 0.02946           |
| Genotype            |     | DM       |      | 1.7196   | 0.02954           |
| Genotype            |     | RY       |      | 1.7324   | 0.02957           |
| Genotype            |     | WT       |      | 1.7115   | 0.02956           |
| Genotype*Dose       |     | CG       | 0.1  | 1.7603   | 0.05880           |
| Genotype*Dose       |     | CG       | 1    | 1.7767   | 0.05895           |
| Genotype*Dose       |     | CG       | 6    | 1.6501   | 0.05911           |
| Genotype*Dose       |     | CG       | 0    | 1.8359   | 0.05880           |
| Genotype*Dose       |     | DM       | 0.1  | 1.6679   | 0.05895           |
| Genotype*Dose       |     | DM       | 1    | 1.8643   | 0.05895           |
| Genotype*Dose       |     | DM       | 6    | 1.6709   | 0.05960           |
| Genotype*Dose       |     | DM       | 0    | 1.6750   | 0.05880           |
| Genotype*Dose       |     | RY       | 0.1  | 1.8058   | 0.05911           |
| Genotype*Dose       |     | RY       | 1    | 1.7700   | 0.05882           |
| Genotype*Dose       |     | RY       | 6    | 1.6981   | 0.05966           |
| Genotype*Dose       |     | RY       | 0    | 1.6556   | 0.05895           |
| Genotype*Dose       |     | WT       | 0.1  | 1.7639   | 0.05895           |
| Genotype*Dose       |     | WT       | 1    | 1.6557   | 0.05950           |
| Genotype*Dose       |     | WT       | 6    | 1.7676   | 0.05911           |
| Genotype*Dose       |     | WT       | 0    | 1.6587   | 0.05895           |

*Mixed model for AUC distal**The Mixed Procedure*

| Differences of Least Squares Means |     |          |      |     |          |      |          |                |     |         |         |
|------------------------------------|-----|----------|------|-----|----------|------|----------|----------------|-----|---------|---------|
| Effect                             | Sex | Genotype | Dose | Sex | Genotype | Dose | Estimate | Standard Error | DF  | t Value | Pr >  t |
| Sex                                | F   |          |      | M   |          |      | 0.02811  | 0.02953        | 171 | 0.95    | 0.3425  |
| Genotype                           |     | CG       |      |     | DM       |      | 0.03620  | 0.04172        | 171 | 0.87    | 0.3867  |
| Genotype                           |     | CG       |      |     | RY       |      | 0.02340  | 0.04174        | 171 | 0.56    | 0.5758  |
| Genotype                           |     | CG       |      |     | WT       |      | 0.04428  | 0.04174        | 171 | 1.06    | 0.2902  |
| Genotype                           |     | DM       |      |     | RY       |      | -0.01281 | 0.04180        | 172 | -0.31   | 0.7597  |
| Genotype                           |     | DM       |      |     | WT       |      | 0.008078 | 0.04179        | 172 | 0.19    | 0.8470  |
| Genotype                           |     | RY       |      |     | WT       |      | 0.02088  | 0.04181        | 172 | 0.50    | 0.6181  |
| Genotype*Dose                      |     | CG       | 0.1  |     | CG       | 1    | -0.01648 | 0.08327        | 169 | -0.20   | 0.8433  |
| Genotype*Dose                      |     | CG       | 0.1  |     | CG       | 6    | 0.1102   | 0.08337        | 170 | 1.32    | 0.1882  |
| Genotype*Dose                      |     | CG       | 0.1  |     | CG       | 0    | -0.07569 | 0.08316        | 169 | -0.91   | 0.3640  |
| Genotype*Dose                      |     | CG       | 0.1  |     | DM       | 0.1  | 0.09231  | 0.08327        | 169 | 1.11    | 0.2692  |
| Genotype*Dose                      |     | CG       | 0.1  |     | DM       | 1    | -0.1041  | 0.08327        | 169 | -1.25   | 0.2132  |
| Genotype*Dose                      |     | CG       | 0.1  |     | DM       | 6    | 0.08933  | 0.08373        | 173 | 1.07    | 0.2875  |
| Genotype*Dose                      |     | CG       | 0.1  |     | DM       | 0    | 0.08522  | 0.08316        | 169 | 1.02    | 0.3069  |
| Genotype*Dose                      |     | CG       | 0.1  |     | RY       | 0.1  | -0.04551 | 0.08337        | 170 | -0.55   | 0.5859  |
| Genotype*Dose                      |     | CG       | 0.1  |     | RY       | 1    | -0.00973 | 0.08317        | 169 | -0.12   | 0.9070  |
| Genotype*Dose                      |     | CG       | 0.1  |     | RY       | 6    | 0.06213  | 0.08377        | 173 | 0.74    | 0.4593  |
| Genotype*Dose                      |     | CG       | 0.1  |     | RY       | 0    | 0.1047   | 0.08327        | 169 | 1.26    | 0.2103  |
| Genotype*Dose                      |     | CG       | 0.1  |     | WT       | 0.1  | -0.00367 | 0.08327        | 169 | -0.04   | 0.9649  |
| Genotype*Dose                      |     | CG       | 0.1  |     | WT       | 1    | 0.1046   | 0.08365        | 172 | 1.25    | 0.2129  |
| Genotype*Dose                      |     | CG       | 0.1  |     | WT       | 6    | -0.00731 | 0.08337        | 170 | -0.09   | 0.9303  |
| Genotype*Dose                      |     | CG       | 0.1  |     | WT       | 0    | 0.1015   | 0.08327        | 169 | 1.22    | 0.2245  |
| Genotype*Dose                      |     | CG       | 1    |     | CG       | 6    | 0.1267   | 0.08348        | 171 | 1.52    | 0.1311  |
| Genotype*Dose                      |     | CG       | 1    |     | CG       | 0    | -0.05920 | 0.08327        | 169 | -0.71   | 0.4781  |
| Genotype*Dose                      |     | CG       | 1    |     | DM       | 0.1  | 0.1088   | 0.08337        | 170 | 1.30    | 0.1937  |
| Genotype*Dose                      |     | CG       | 1    |     | DM       | 1    | -0.08757 | 0.08337        | 170 | -1.05   | 0.2951  |
| Genotype*Dose                      |     | CG       | 1    |     | DM       | 6    | 0.1058   | 0.08383        | 174 | 1.26    | 0.2086  |
| Genotype*Dose                      |     | CG       | 1    |     | DM       | 0    | 0.1017   | 0.08327        | 169 | 1.22    | 0.2236  |
| Genotype*Dose                      |     | CG       | 1    |     | RY       | 0.1  | -0.02903 | 0.08348        | 171 | -0.35   | 0.7285  |
| Genotype*Dose                      |     | CG       | 1    |     | RY       | 1    | 0.006750 | 0.08328        | 169 | 0.08    | 0.9355  |
| Genotype*Dose                      |     | CG       | 1    |     | RY       | 6    | 0.07862  | 0.08387        | 174 | 0.94    | 0.3499  |
| Genotype*Dose                      |     | CG       | 1    |     | RY       | 0    | 0.1212   | 0.08337        | 170 | 1.45    | 0.1479  |

*Mixed model for AUC distal**The Mixed Procedure*

| Differences of Least Squares Means |     |          |      |     |          |      |          |                |     |         |         |
|------------------------------------|-----|----------|------|-----|----------|------|----------|----------------|-----|---------|---------|
| Effect                             | Sex | Genotype | Dose | Sex | Genotype | Dose | Estimate | Standard Error | DF  | t Value | Pr >  t |
| Genotype*Dose                      |     | CG       | 1    |     | WT       | 0.1  | 0.01281  | 0.08337        | 170 | 0.15    | 0.8780  |
| Genotype*Dose                      |     | CG       | 1    |     | WT       | 1    | 0.1211   | 0.08376        | 173 | 1.45    | 0.1501  |
| Genotype*Dose                      |     | CG       | 1    |     | WT       | 6    | 0.009176 | 0.08348        | 171 | 0.11    | 0.9126  |
| Genotype*Dose                      |     | CG       | 1    |     | WT       | 0    | 0.1180   | 0.08337        | 170 | 1.42    | 0.1588  |
| Genotype*Dose                      |     | CG       | 6    |     | CG       | 0    | -0.1859  | 0.08337        | 170 | -2.23   | 0.0271  |
| Genotype*Dose                      |     | CG       | 6    |     | DM       | 0.1  | -0.01786 | 0.08348        | 171 | -0.21   | 0.8309  |
| Genotype*Dose                      |     | CG       | 6    |     | DM       | 1    | -0.2142  | 0.08348        | 171 | -2.57   | 0.0111  |
| Genotype*Dose                      |     | CG       | 6    |     | DM       | 6    | -0.02084 | 0.08394        | 175 | -0.25   | 0.8043  |
| Genotype*Dose                      |     | CG       | 6    |     | DM       | 0    | -0.02494 | 0.08337        | 170 | -0.30   | 0.7652  |
| Genotype*Dose                      |     | CG       | 6    |     | RY       | 0.1  | -0.1557  | 0.08359        | 172 | -1.86   | 0.0643  |
| Genotype*Dose                      |     | CG       | 6    |     | RY       | 1    | -0.1199  | 0.08339        | 170 | -1.44   | 0.1523  |
| Genotype*Dose                      |     | CG       | 6    |     | RY       | 6    | -0.04803 | 0.08398        | 175 | -0.57   | 0.5681  |
| Genotype*Dose                      |     | CG       | 6    |     | RY       | 0    | -0.00546 | 0.08348        | 171 | -0.07   | 0.9479  |
| Genotype*Dose                      |     | CG       | 6    |     | WT       | 0.1  | -0.1138  | 0.08348        | 171 | -1.36   | 0.1745  |
| Genotype*Dose                      |     | CG       | 6    |     | WT       | 1    | -0.00557 | 0.08387        | 174 | -0.07   | 0.9471  |
| Genotype*Dose                      |     | CG       | 6    |     | WT       | 6    | -0.1175  | 0.08359        | 172 | -1.41   | 0.1617  |
| Genotype*Dose                      |     | CG       | 6    |     | WT       | 0    | -0.00866 | 0.08348        | 171 | -0.10   | 0.9175  |
| Genotype*Dose                      |     | CG       | 0    |     | DM       | 0.1  | 0.1680   | 0.08327        | 169 | 2.02    | 0.0452  |
| Genotype*Dose                      |     | CG       | 0    |     | DM       | 1    | -0.02837 | 0.08327        | 169 | -0.34   | 0.7338  |
| Genotype*Dose                      |     | CG       | 0    |     | DM       | 6    | 0.1650   | 0.08373        | 173 | 1.97    | 0.0503  |
| Genotype*Dose                      |     | CG       | 0    |     | DM       | 0    | 0.1609   | 0.08316        | 169 | 1.94    | 0.0547  |
| Genotype*Dose                      |     | CG       | 0    |     | RY       | 0.1  | 0.03017  | 0.08337        | 170 | 0.36    | 0.7179  |
| Genotype*Dose                      |     | CG       | 0    |     | RY       | 1    | 0.06595  | 0.08317        | 169 | 0.79    | 0.4289  |
| Genotype*Dose                      |     | CG       | 0    |     | RY       | 6    | 0.1378   | 0.08377        | 173 | 1.65    | 0.1017  |
| Genotype*Dose                      |     | CG       | 0    |     | RY       | 0    | 0.1804   | 0.08327        | 169 | 2.17    | 0.0317  |
| Genotype*Dose                      |     | CG       | 0    |     | WT       | 0.1  | 0.07202  | 0.08327        | 169 | 0.86    | 0.3883  |
| Genotype*Dose                      |     | CG       | 0    |     | WT       | 1    | 0.1803   | 0.08365        | 172 | 2.16    | 0.0325  |
| Genotype*Dose                      |     | CG       | 0    |     | WT       | 6    | 0.06838  | 0.08337        | 170 | 0.82    | 0.4133  |
| Genotype*Dose                      |     | CG       | 0    |     | WT       | 0    | 0.1772   | 0.08327        | 169 | 2.13    | 0.0348  |
| Genotype*Dose                      |     | DM       | 0.1  |     | DM       | 1    | -0.1964  | 0.08337        | 170 | -2.36   | 0.0197  |
| Genotype*Dose                      |     | DM       | 0.1  |     | DM       | 6    | -0.00298 | 0.08383        | 174 | -0.04   | 0.9717  |
| Genotype*Dose                      |     | DM       | 0.1  |     | DM       | 0    | -0.00709 | 0.08327        | 169 | -0.09   | 0.9323  |

*Mixed model for AUC distal**The Mixed Procedure*

| Differences of Least Squares Means |     |          |      |     |          |      |          |                |     |         |         |
|------------------------------------|-----|----------|------|-----|----------|------|----------|----------------|-----|---------|---------|
| Effect                             | Sex | Genotype | Dose | Sex | Genotype | Dose | Estimate | Standard Error | DF  | t Value | Pr >  t |
| Genotype*Dose                      |     | DM       | 0.1  |     | RY       | 0.1  | -0.1378  | 0.08348        | 171 | -1.65   | 0.1006  |
| Genotype*Dose                      |     | DM       | 0.1  |     | RY       | 1    | -0.1020  | 0.08328        | 169 | -1.23   | 0.2221  |
| Genotype*Dose                      |     | DM       | 0.1  |     | RY       | 6    | -0.03018 | 0.08387        | 174 | -0.36   | 0.7194  |
| Genotype*Dose                      |     | DM       | 0.1  |     | RY       | 0    | 0.01239  | 0.08337        | 170 | 0.15    | 0.8820  |
| Genotype*Dose                      |     | DM       | 0.1  |     | WT       | 0.1  | -0.09598 | 0.08337        | 170 | -1.15   | 0.2513  |
| Genotype*Dose                      |     | DM       | 0.1  |     | WT       | 1    | 0.01229  | 0.08376        | 173 | 0.15    | 0.8835  |
| Genotype*Dose                      |     | DM       | 0.1  |     | WT       | 6    | -0.09962 | 0.08348        | 171 | -1.19   | 0.2344  |
| Genotype*Dose                      |     | DM       | 0.1  |     | WT       | 0    | 0.009195 | 0.08337        | 170 | 0.11    | 0.9123  |
| Genotype*Dose                      |     | DM       | 1    |     | DM       | 6    | 0.1934   | 0.08383        | 174 | 2.31    | 0.0222  |
| Genotype*Dose                      |     | DM       | 1    |     | DM       | 0    | 0.1893   | 0.08327        | 169 | 2.27    | 0.0243  |
| Genotype*Dose                      |     | DM       | 1    |     | RY       | 0.1  | 0.05854  | 0.08348        | 171 | 0.70    | 0.4841  |
| Genotype*Dose                      |     | DM       | 1    |     | RY       | 1    | 0.09432  | 0.08328        | 169 | 1.13    | 0.2590  |
| Genotype*Dose                      |     | DM       | 1    |     | RY       | 6    | 0.1662   | 0.08387        | 174 | 1.98    | 0.0491  |
| Genotype*Dose                      |     | DM       | 1    |     | RY       | 0    | 0.2088   | 0.08337        | 170 | 2.50    | 0.0132  |
| Genotype*Dose                      |     | DM       | 1    |     | WT       | 0.1  | 0.1004   | 0.08337        | 170 | 1.20    | 0.2303  |
| Genotype*Dose                      |     | DM       | 1    |     | WT       | 1    | 0.2087   | 0.08376        | 173 | 2.49    | 0.0137  |
| Genotype*Dose                      |     | DM       | 1    |     | WT       | 6    | 0.09674  | 0.08348        | 171 | 1.16    | 0.2481  |
| Genotype*Dose                      |     | DM       | 1    |     | WT       | 0    | 0.2056   | 0.08337        | 170 | 2.47    | 0.0147  |
| Genotype*Dose                      |     | DM       | 6    |     | DM       | 0    | -0.00411 | 0.08373        | 173 | -0.05   | 0.9609  |
| Genotype*Dose                      |     | DM       | 6    |     | RY       | 0.1  | -0.1348  | 0.08394        | 175 | -1.61   | 0.1100  |
| Genotype*Dose                      |     | DM       | 6    |     | RY       | 1    | -0.09907 | 0.08374        | 173 | -1.18   | 0.2384  |
| Genotype*Dose                      |     | DM       | 6    |     | RY       | 6    | -0.02720 | 0.08433        | 177 | -0.32   | 0.7474  |
| Genotype*Dose                      |     | DM       | 6    |     | RY       | 0    | 0.01537  | 0.08383        | 174 | 0.18    | 0.8547  |
| Genotype*Dose                      |     | DM       | 6    |     | WT       | 0.1  | -0.09300 | 0.08383        | 174 | -1.11   | 0.2688  |
| Genotype*Dose                      |     | DM       | 6    |     | WT       | 1    | 0.01527  | 0.08422        | 176 | 0.18    | 0.8564  |
| Genotype*Dose                      |     | DM       | 6    |     | WT       | 6    | -0.09664 | 0.08394        | 175 | -1.15   | 0.2512  |
| Genotype*Dose                      |     | DM       | 6    |     | WT       | 0    | 0.01217  | 0.08383        | 174 | 0.15    | 0.8847  |
| Genotype*Dose                      |     | DM       | 0    |     | RY       | 0.1  | -0.1307  | 0.08337        | 170 | -1.57   | 0.1187  |
| Genotype*Dose                      |     | DM       | 0    |     | RY       | 1    | -0.09496 | 0.08317        | 169 | -1.14   | 0.2552  |
| Genotype*Dose                      |     | DM       | 0    |     | RY       | 6    | -0.02309 | 0.08377        | 173 | -0.28   | 0.7831  |
| Genotype*Dose                      |     | DM       | 0    |     | RY       | 0    | 0.01948  | 0.08327        | 169 | 0.23    | 0.8153  |
| Genotype*Dose                      |     | DM       | 0    |     | WT       | 0.1  | -0.08889 | 0.08327        | 169 | -1.07   | 0.2872  |

*Mixed model for AUC distal**The Mixed Procedure*

| Differences of Least Squares Means |     |          |      |     |          |      |          |                |     |         |         |
|------------------------------------|-----|----------|------|-----|----------|------|----------|----------------|-----|---------|---------|
| Effect                             | Sex | Genotype | Dose | Sex | Genotype | Dose | Estimate | Standard Error | DF  | t Value | Pr >  t |
| Genotype*Dose                      |     | DM       | 0    |     | WT       | 1    | 0.01937  | 0.08365        | 172 | 0.23    | 0.8171  |
| Genotype*Dose                      |     | DM       | 0    |     | WT       | 6    | -0.09253 | 0.08337        | 170 | -1.11   | 0.2686  |
| Genotype*Dose                      |     | DM       | 0    |     | WT       | 0    | 0.01628  | 0.08327        | 169 | 0.20    | 0.8452  |
| Genotype*Dose                      |     | RY       | 0.1  |     | RY       | 1    | 0.03578  | 0.08339        | 170 | 0.43    | 0.6684  |
| Genotype*Dose                      |     | RY       | 0.1  |     | RY       | 6    | 0.1076   | 0.08398        | 175 | 1.28    | 0.2016  |
| Genotype*Dose                      |     | RY       | 0.1  |     | RY       | 0    | 0.1502   | 0.08348        | 171 | 1.80    | 0.0737  |
| Genotype*Dose                      |     | RY       | 0.1  |     | WT       | 0.1  | 0.04184  | 0.08348        | 171 | 0.50    | 0.6169  |
| Genotype*Dose                      |     | RY       | 0.1  |     | WT       | 1    | 0.1501   | 0.08387        | 174 | 1.79    | 0.0752  |
| Genotype*Dose                      |     | RY       | 0.1  |     | WT       | 6    | 0.03820  | 0.08359        | 172 | 0.46    | 0.6482  |
| Genotype*Dose                      |     | RY       | 0.1  |     | WT       | 0    | 0.1470   | 0.08348        | 171 | 1.76    | 0.0800  |
| Genotype*Dose                      |     | RY       | 1    |     | RY       | 6    | 0.07187  | 0.08378        | 173 | 0.86    | 0.3922  |
| Genotype*Dose                      |     | RY       | 1    |     | RY       | 0    | 0.1144   | 0.08328        | 169 | 1.37    | 0.1712  |
| Genotype*Dose                      |     | RY       | 1    |     | WT       | 0.1  | 0.006065 | 0.08328        | 169 | 0.07    | 0.9420  |
| Genotype*Dose                      |     | RY       | 1    |     | WT       | 1    | 0.1143   | 0.08367        | 172 | 1.37    | 0.1736  |
| Genotype*Dose                      |     | RY       | 1    |     | WT       | 6    | 0.002426 | 0.08339        | 170 | 0.03    | 0.9768  |
| Genotype*Dose                      |     | RY       | 1    |     | WT       | 0    | 0.1112   | 0.08328        | 169 | 1.34    | 0.1834  |
| Genotype*Dose                      |     | RY       | 6    |     | RY       | 0    | 0.04257  | 0.08387        | 174 | 0.51    | 0.6124  |
| Genotype*Dose                      |     | RY       | 6    |     | WT       | 0.1  | -0.06580 | 0.08387        | 174 | -0.78   | 0.4338  |
| Genotype*Dose                      |     | RY       | 6    |     | WT       | 1    | 0.04247  | 0.08426        | 176 | 0.50    | 0.6149  |
| Genotype*Dose                      |     | RY       | 6    |     | WT       | 6    | -0.06944 | 0.08398        | 175 | -0.83   | 0.4094  |
| Genotype*Dose                      |     | RY       | 6    |     | WT       | 0    | 0.03937  | 0.08387        | 174 | 0.47    | 0.6394  |
| Genotype*Dose                      |     | RY       | 0    |     | WT       | 0.1  | -0.1084  | 0.08337        | 170 | -1.30   | 0.1954  |
| Genotype*Dose                      |     | RY       | 0    |     | WT       | 1    | -0.00010 | 0.08376        | 173 | -0.00   | 0.9990  |
| Genotype*Dose                      |     | RY       | 0    |     | WT       | 6    | -0.1120  | 0.08348        | 171 | -1.34   | 0.1815  |
| Genotype*Dose                      |     | RY       | 0    |     | WT       | 0    | -0.00320 | 0.08337        | 170 | -0.04   | 0.9694  |
| Genotype*Dose                      |     | WT       | 0.1  |     | WT       | 1    | 0.1083   | 0.08376        | 173 | 1.29    | 0.1979  |
| Genotype*Dose                      |     | WT       | 0.1  |     | WT       | 6    | -0.00364 | 0.08348        | 171 | -0.04   | 0.9653  |
| Genotype*Dose                      |     | WT       | 0.1  |     | WT       | 0    | 0.1052   | 0.08337        | 170 | 1.26    | 0.2089  |
| Genotype*Dose                      |     | WT       | 1    |     | WT       | 6    | -0.1119  | 0.08387        | 174 | -1.33   | 0.1838  |
| Genotype*Dose                      |     | WT       | 1    |     | WT       | 0    | -0.00309 | 0.08376        | 173 | -0.04   | 0.9706  |
| Genotype*Dose                      |     | WT       | 6    |     | WT       | 0    | 0.1088   | 0.08348        | 171 | 1.30    | 0.1942  |

**Mixed Effects Model for Total Dendrites****The Mixed Procedure**

| Solution for Fixed Effects |     |          |      |          |                |     |         |         |       |         |        |
|----------------------------|-----|----------|------|----------|----------------|-----|---------|---------|-------|---------|--------|
| Effect                     | Sex | Genotype | Dose | Estimate | Standard Error | DF  | t Value | Pr >  t | Alpha | Lower   | Upper  |
| Intercept                  |     |          |      | 6.0913   | 0.1252         | 181 | 48.65   | <.0001  | 0.05  | 5.8443  | 6.3384 |
| Sex                        | F   |          |      | 0.03278  | 0.08868        | 182 | 0.37    | 0.7121  | 0.05  | -0.1422 | 0.2077 |
| Sex                        | M   |          |      | 0        | .              | .   | .       | .       | .     | .       | .      |
| Genotype                   |     | CG       |      | -0.03414 | 0.1253         | 182 | -0.27   | 0.7856  | 0.05  | -0.2814 | 0.2131 |
| Genotype                   |     | DM       |      | 0.002304 | 0.1255         | 183 | 0.02    | 0.9854  | 0.05  | -0.2453 | 0.2499 |
| Genotype                   |     | RY       |      | 0.03738  | 0.1256         | 183 | 0.30    | 0.7663  | 0.05  | -0.2104 | 0.2852 |
| Genotype                   |     | WT       |      | 0        | .              | .   | .       | .       | .     | .       | .      |
| Dose                       |     |          | 0.1  | 0.1224   | 0.1250         | 181 | 0.98    | 0.3289  | 0.05  | -0.1243 | 0.3691 |
| Dose                       |     |          | 1    | 0.3725   | 0.1251         | 181 | 2.98    | 0.0033  | 0.05  | 0.1256  | 0.6195 |
| Dose                       |     |          | 6    | 0.01821  | 0.1256         | 183 | 0.15    | 0.8848  | 0.05  | -0.2295 | 0.2660 |
| Dose                       |     |          | 0    | 0        | .              | .   | .       | .       | .     | .       | .      |

| Type 3 Tests of Fixed Effects |        |        |         |        |
|-------------------------------|--------|--------|---------|--------|
| Effect                        | Num DF | Den DF | F Value | Pr > F |
| Sex                           | 1      | 182    | 0.14    | 0.7121 |
| Genotype                      | 3      | 182    | 0.11    | 0.9549 |
| Dose                          | 3      | 182    | 3.74    | 0.0122 |

| Least Squares Means |     |          |      |          |                |
|---------------------|-----|----------|------|----------|----------------|
| Effect              | Sex | Genotype | Dose | Estimate | Standard Error |
| Sex                 | F   |          |      | 6.2538   | 0.06270        |
| Sex                 | M   |          |      | 6.2210   | 0.06271        |
| Genotype            |     | CG       |      | 6.2019   | 0.08840        |
| Genotype            |     | DM       |      | 6.2383   | 0.08871        |
| Genotype            |     | RY       |      | 6.2734   | 0.08881        |
| Genotype            |     | WT       |      | 6.2360   | 0.08880        |
| Dose                |     |          | 0.1  | 6.2315   | 0.08848        |
| Dose                |     |          | 1    | 6.4816   | 0.08866        |

*Mixed Effects Model for Total Dendrites**The Mixed Procedure*

| Least Squares Means |     |          |      |          |                |
|---------------------|-----|----------|------|----------|----------------|
| Effect              | Sex | Genotype | Dose | Estimate | Standard Error |
| Dose                |     |          | 6    | 6.1273   | 0.08925        |
| Dose                |     |          | 0    | 6.1091   | 0.08833        |

| Differences of Least Squares Means |     |          |      |     |          |      |          |                |     |         |         |
|------------------------------------|-----|----------|------|-----|----------|------|----------|----------------|-----|---------|---------|
| Effect                             | Sex | Genotype | Dose | Sex | Genotype | Dose | Estimate | Standard Error | DF  | t Value | Pr >  t |
| Sex                                | F   |          |      | M   |          |      | 0.03278  | 0.08868        | 182 | 0.37    | 0.7121  |
| Genotype                           |     | CG       |      |     | DM       |      | -0.03645 | 0.1252         | 182 | -0.29   | 0.7714  |
| Genotype                           |     | CG       |      |     | RY       |      | -0.07152 | 0.1253         | 182 | -0.57   | 0.5688  |
| Genotype                           |     | CG       |      |     | WT       |      | -0.03414 | 0.1253         | 182 | -0.27   | 0.7856  |
| Genotype                           |     | DM       |      |     | RY       |      | -0.03508 | 0.1255         | 183 | -0.28   | 0.7802  |
| Genotype                           |     | DM       |      |     | WT       |      | 0.002304 | 0.1255         | 183 | 0.02    | 0.9854  |
| Genotype                           |     | RY       |      |     | WT       |      | 0.03738  | 0.1256         | 183 | 0.30    | 0.7663  |
| Dose                               |     |          | 0.1  |     |          | 1    | -0.2501  | 0.1253         | 182 | -2.00   | 0.0473  |
| Dose                               |     |          | 0.1  |     |          | 6    | 0.1042   | 0.1257         | 184 | 0.83    | 0.4082  |
| Dose                               |     |          | 0.1  |     |          | 0    | 0.1224   | 0.1250         | 181 | 0.98    | 0.3289  |
| Dose                               |     |          | 1    |     |          | 6    | 0.3543   | 0.1258         | 184 | 2.82    | 0.0054  |
| Dose                               |     |          | 1    |     |          | 0    | 0.3725   | 0.1251         | 181 | 2.98    | 0.0033  |
| Dose                               |     |          | 6    |     |          | 0    | 0.01821  | 0.1256         | 183 | 0.15    | 0.8848  |

**Mixed Effects Model for terminal tips****The Mixed Procedure**

| Solution for Fixed Effects |     |          |      |          |                |     |         |         |       |         |         |
|----------------------------|-----|----------|------|----------|----------------|-----|---------|---------|-------|---------|---------|
| Effect                     | Sex | Genotype | Dose | Estimate | Standard Error | DF  | t Value | Pr >  t | Alpha | Lower   | Upper   |
| Intercept                  |     |          |      | 11.5335  | 0.3202         | 183 | 36.02   | <.0001  | 0.05  | 10.9018 | 12.1653 |
| Sex                        | F   |          |      | 0.2739   | 0.2266         | 183 | 1.21    | 0.2284  | 0.05  | -0.1733 | 0.7210  |
| Sex                        | M   |          |      | 0        | .              | .   | .       | .       | .     | .       | .       |
| Genotype                   |     | CG       |      | 0.2369   | 0.3204         | 183 | 0.74    | 0.4605  | 0.05  | -0.3952 | 0.8690  |
| Genotype                   |     | DM       |      | -0.06983 | 0.3207         | 184 | -0.22   | 0.8279  | 0.05  | -0.7025 | 0.5628  |
| Genotype                   |     | RY       |      | 0.04204  | 0.3208         | 184 | 0.13    | 0.8959  | 0.05  | -0.5908 | 0.6749  |
| Genotype                   |     | WT       |      | 0        | .              | .   | .       | .       | .     | .       | .       |
| Dose                       |     |          | 0.1  | -0.00265 | 0.3199         | 182 | -0.01   | 0.9934  | 0.05  | -0.6339 | 0.6286  |
| Dose                       |     |          | 1    | 0.9588   | 0.3201         | 182 | 3.00    | 0.0031  | 0.05  | 0.3272  | 1.5905  |
| Dose                       |     |          | 6    | -0.3060  | 0.3207         | 184 | -0.95   | 0.3412  | 0.05  | -0.9388 | 0.3268  |
| Dose                       |     |          | 0    | 0        | .              | .   | .       | .       | .     | .       | .       |

| Type 3 Tests of Fixed Effects |        |        |         |        |
|-------------------------------|--------|--------|---------|--------|
| Effect                        | Num DF | Den DF | F Value | Pr > F |
| Sex                           | 1      | 183    | 1.46    | 0.2284 |
| Genotype                      | 3      | 183    | 0.34    | 0.7985 |
| Dose                          | 3      | 183    | 5.88    | 0.0007 |

| Least Squares Means |     |          |      |          |                |
|---------------------|-----|----------|------|----------|----------------|
| Effect              | Sex | Genotype | Dose | Estimate | Standard Error |
| Sex                 | F   |          |      | 12.0223  | 0.1603         |
| Sex                 | M   |          |      | 11.7484  | 0.1603         |
| Genotype            |     | CG       |      | 12.0699  | 0.2262         |
| Genotype            |     | DM       |      | 11.7632  | 0.2267         |
| Genotype            |     | RY       |      | 11.8751  | 0.2268         |
| Genotype            |     | WT       |      | 11.8330  | 0.2268         |
| Dose                |     |          | 0.1  | 11.7201  | 0.2263         |
| Dose                |     |          | 1    | 12.6816  | 0.2266         |

*Mixed Effects Model for terminal tips**The Mixed Procedure*

| Least Squares Means |     |          |      |          |                |
|---------------------|-----|----------|------|----------|----------------|
| Effect              | Sex | Genotype | Dose | Estimate | Standard Error |
| Dose                |     |          | 6    | 11.4167  | 0.2275         |
| Dose                |     |          | 0    | 11.7228  | 0.2261         |

| Differences of Least Squares Means |     |          |      |     |          |      |          |                |     |         |         |
|------------------------------------|-----|----------|------|-----|----------|------|----------|----------------|-----|---------|---------|
| Effect                             | Sex | Genotype | Dose | Sex | Genotype | Dose | Estimate | Standard Error | DF  | t Value | Pr >  t |
| Sex                                | F   |          |      | M   |          |      | 0.2739   | 0.2266         | 183 | 1.21    | 0.2284  |
| Genotype                           |     | CG       |      |     | DM       |      | 0.3067   | 0.3202         | 183 | 0.96    | 0.3394  |
| Genotype                           |     | CG       |      |     | RY       |      | 0.1949   | 0.3204         | 183 | 0.61    | 0.5437  |
| Genotype                           |     | CG       |      |     | WT       |      | 0.2369   | 0.3204         | 183 | 0.74    | 0.4605  |
| Genotype                           |     | DM       |      |     | RY       |      | -0.1119  | 0.3207         | 184 | -0.35   | 0.7276  |
| Genotype                           |     | DM       |      |     | WT       |      | -0.06983 | 0.3207         | 184 | -0.22   | 0.8279  |
| Genotype                           |     | RY       |      |     | WT       |      | 0.04204  | 0.3208         | 184 | 0.13    | 0.8959  |
| Dose                               |     |          | 0.1  |     |          | 1    | -0.9615  | 0.3203         | 183 | -3.00   | 0.0031  |
| Dose                               |     |          | 0.1  |     |          | 6    | 0.3034   | 0.3209         | 184 | 0.95    | 0.3456  |
| Dose                               |     |          | 0.1  |     |          | 0    | -0.00265 | 0.3199         | 182 | -0.01   | 0.9934  |
| Dose                               |     |          | 1    |     |          | 6    | 1.2649   | 0.3211         | 184 | 3.94    | 0.0001  |
| Dose                               |     |          | 1    |     |          | 0    | 0.9588   | 0.3201         | 182 | 3.00    | 0.0031  |
| Dose                               |     |          | 6    |     |          | 0    | -0.3060  | 0.3207         | 184 | -0.95   | 0.3412  |

*Mixed Effects Model for dendrite length sum**The Mixed Procedure*

| Solution for Fixed Effects |     |          |      |          |                |     |         |         |       |          |          |
|----------------------------|-----|----------|------|----------|----------------|-----|---------|---------|-------|----------|----------|
| Effect                     | Sex | Genotype | Dose | Estimate | Standard Error | DF  | t Value | Pr >  t | Alpha | Lower    | Upper    |
| Intercept                  |     |          |      | 587.25   | 36.6338        | 173 | 16.03   | <.0001  | 0.05  | 514.94   | 659.55   |
| Sex                        | F   |          |      | 9.2600   | 17.7872        | 174 | 0.52    | 0.6033  | 0.05  | -25.8470 | 44.3671  |
| Sex                        | M   |          |      | 0        | .              | .   | .       | .       | .     | .        | .        |
| Genotype                   |     | CG       |      | 128.08   | 50.2063        | 172 | 2.55    | 0.0116  | 0.05  | 28.9778  | 227.18   |
| Genotype                   |     | DM       |      | 22.9017  | 50.2063        | 172 | 0.46    | 0.6489  | 0.05  | -76.1972 | 122.00   |
| Genotype                   |     | RY       |      | -5.7241  | 50.2477        | 173 | -0.11   | 0.9094  | 0.05  | -104.90  | 93.4543  |
| Genotype                   |     | WT       |      | 0        | .              | .   | .       | .       | .     | .        | .        |
| Dose                       |     |          | 0.1  | 52.0065  | 50.2477        | 173 | 1.04    | 0.3021  | 0.05  | -47.1720 | 151.18   |
| Dose                       |     |          | 1    | 42.7621  | 50.4042        | 175 | 0.85    | 0.3974  | 0.05  | -56.7175 | 142.24   |
| Dose                       |     |          | 6    | 74.2940  | 50.2893        | 173 | 1.48    | 0.1414  | 0.05  | -24.9643 | 173.55   |
| Dose                       |     |          | 0    | 0        | .              | .   | .       | .       | .     | .        | .        |
| Genotype*Dose              |     | CG       | 0.1  | -116.54  | 71.0025        | 172 | -1.64   | 0.1025  | 0.05  | -256.69  | 23.6052  |
| Genotype*Dose              |     | CG       | 1    | -80.7242 | 71.1425        | 173 | -1.13   | 0.2581  | 0.05  | -221.14  | 59.6923  |
| Genotype*Dose              |     | CG       | 6    | -215.30  | 71.0906        | 173 | -3.03   | 0.0028  | 0.05  | -355.61  | -74.9805 |
| Genotype*Dose              |     | CG       | 0    | 0        | .              | .   | .       | .       | .     | .        | .        |
| Genotype*Dose              |     | DM       | 0.1  | -67.8833 | 71.0318        | 173 | -0.96   | 0.3406  | 0.05  | -208.09  | 72.3201  |
| Genotype*Dose              |     | DM       | 1    | 96.1550  | 71.1426        | 173 | 1.35    | 0.1783  | 0.05  | -44.2616 | 236.57   |
| Genotype*Dose              |     | DM       | 6    | -104.93  | 71.1865        | 174 | -1.47   | 0.1423  | 0.05  | -245.43  | 35.5751  |
| Genotype*Dose              |     | DM       | 0    | 0        | .              | .   | .       | .       | .     | .        | .        |
| Genotype*Dose              |     | RY       | 0.1  | 34.5311  | 71.0905        | 173 | 0.49    | 0.6278  | 0.05  | -105.78  | 174.85   |
| Genotype*Dose              |     | RY       | 1    | 68.3232  | 71.1473        | 173 | 0.96    | 0.3382  | 0.05  | -72.1026 | 208.75   |
| Genotype*Dose              |     | RY       | 6    | -44.0223 | 71.2313        | 174 | -0.62   | 0.5374  | 0.05  | -184.61  | 96.5646  |
| Genotype*Dose              |     | RY       | 0    | 0        | .              | .   | .       | .       | .     | .        | .        |
| Genotype*Dose              |     | WT       | 0.1  | 0        | .              | .   | .       | .       | .     | .        | .        |
| Genotype*Dose              |     | WT       | 1    | 0        | .              | .   | .       | .       | .     | .        | .        |
| Genotype*Dose              |     | WT       | 6    | 0        | .              | .   | .       | .       | .     | .        | .        |
| Genotype*Dose              |     | WT       | 0    | 0        | .              | .   | .       | .       | .     | .        | .        |

*Mixed Effects Model for dendrite length sum**The Mixed Procedure*

| Type 3 Tests of Fixed Effects |           |           |         |        |
|-------------------------------|-----------|-----------|---------|--------|
| Effect                        | Num<br>DF | Den<br>DF | F Value | Pr > F |
| Sex                           | 1         | 174       | 0.27    | 0.6033 |
| Genotype                      | 3         | 174       | 0.38    | 0.7661 |
| Dose                          | 3         | 174       | 3.79    | 0.0114 |
| Genotype*Dose                 | 9         | 174       | 2.22    | 0.0229 |

| Least Squares Means |     |          |      |          |                   |
|---------------------|-----|----------|------|----------|-------------------|
| Effect              | Sex | Genotype | Dose | Estimate | Standard<br>Error |
| Sex                 | F   |          |      | 648.19   | 12.5775           |
| Sex                 | M   |          |      | 638.93   | 12.5774           |
| Genotype            |     | CG       |      | 659.08   | 17.7580           |
| Genotype            |     | DM       |      | 637.88   | 17.7893           |
| Genotype            |     | RY       |      | 643.12   | 17.8017           |
| Genotype            |     | WT       |      | 634.14   | 17.8003           |
| Dose                |     |          | 0.1  | 642.72   | 17.7653           |
| Dose                |     |          | 1    | 691.89   | 17.7868           |
| Dose                |     |          | 6    | 611.42   | 17.8464           |
| Dose                |     |          | 0    | 628.19   | 17.7506           |
| Genotype*Dose       |     | CG       | 0.1  | 655.42   | 35.4720           |
| Genotype*Dose       |     | CG       | 1    | 681.99   | 35.5305           |
| Genotype*Dose       |     | CG       | 6    | 578.95   | 35.5893           |
| Genotype*Dose       |     | CG       | 0    | 719.95   | 35.4720           |
| Genotype*Dose       |     | DM       | 0.1  | 598.90   | 35.5305           |
| Genotype*Dose       |     | DM       | 1    | 753.69   | 35.5305           |
| Genotype*Dose       |     | DM       | 6    | 584.15   | 35.7805           |
| Genotype*Dose       |     | DM       | 0    | 614.78   | 35.4720           |
| Genotype*Dose       |     | RY       | 0.1  | 672.69   | 35.5893           |
| Genotype*Dose       |     | RY       | 1    | 697.24   | 35.4815           |
| Genotype*Dose       |     | RY       | 6    | 616.42   | 35.8114           |
| Genotype*Dose       |     | RY       | 0    | 586.15   | 35.5305           |
| Genotype*Dose       |     | WT       | 0.1  | 643.88   | 35.5305           |
| Genotype*Dose       |     | WT       | 1    | 634.64   | 35.7514           |

*Mixed Effects Model for dendrite length sum**The Mixed Procedure*

| Least Squares Means |     |          |      |          |                |
|---------------------|-----|----------|------|----------|----------------|
| Effect              | Sex | Genotype | Dose | Estimate | Standard Error |
| Genotype*Dose       |     | WT       | 6    | 666.17   | 35.5893        |
| Genotype*Dose       |     | WT       | 0    | 591.88   | 35.5305        |

| Differences of Least Squares Means |     |          |      |     |          |      |          |                |     |         |         |
|------------------------------------|-----|----------|------|-----|----------|------|----------|----------------|-----|---------|---------|
| Effect                             | Sex | Genotype | Dose | Sex | Genotype | Dose | Estimate | Standard Error | DF  | t Value | Pr >  t |
| Sex                                | F   |          |      | M   |          |      | 9.2600   | 17.7872        | 174 | 0.52    | 0.6033  |
| Genotype                           |     | CG       |      |     | DM       |      | 21.1977  | 25.1357        | 173 | 0.84    | 0.4002  |
| Genotype                           |     | CG       |      |     | RY       |      | 15.9521  | 25.1445        | 173 | 0.63    | 0.5266  |
| Genotype                           |     | CG       |      |     | WT       |      | 24.9360  | 25.1435        | 173 | 0.99    | 0.3227  |
| Genotype                           |     | DM       |      |     | RY       |      | -5.2456  | 25.1666        | 174 | -0.21   | 0.8351  |
| Genotype                           |     | DM       |      |     | WT       |      | 3.7383   | 25.1656        | 174 | 0.15    | 0.8821  |
| Genotype                           |     | RY       |      |     | WT       |      | 8.9839   | 25.1744        | 174 | 0.36    | 0.7216  |
| Dose                               |     |          | 0.1  |     |          | 1    | -49.1677 | 25.1391        | 173 | -1.96   | 0.0521  |
| Dose                               |     |          | 0.1  |     |          | 6    | 31.3001  | 25.1813        | 174 | 1.24    | 0.2155  |
| Dose                               |     |          | 0.1  |     |          | 0    | 14.5330  | 25.1135        | 173 | 0.58    | 0.5636  |
| Dose                               |     |          | 1    |     |          | 6    | 80.4677  | 25.1965        | 175 | 3.19    | 0.0017  |
| Dose                               |     |          | 1    |     |          | 0    | 63.7006  | 25.1288        | 173 | 2.53    | 0.0121  |
| Dose                               |     |          | 6    |     |          | 0    | -16.7671 | 25.1710        | 174 | -0.67   | 0.5062  |
| Genotype*Dose                      |     | CG       | 0.1  |     | CG       | 1    | -26.5734 | 50.2063        | 172 | -0.53   | 0.5973  |
| Genotype*Dose                      |     | CG       | 0.1  |     | CG       | 6    | 76.4673  | 50.2480        | 173 | 1.52    | 0.1299  |
| Genotype*Dose                      |     | CG       | 0.1  |     | CG       | 0    | -64.5354 | 50.1649        | 172 | -1.29   | 0.2000  |
| Genotype*Dose                      |     | CG       | 0.1  |     | DM       | 0.1  | 56.5164  | 50.2063        | 172 | 1.13    | 0.2619  |
| Genotype*Dose                      |     | CG       | 0.1  |     | DM       | 1    | -98.2776 | 50.2063        | 172 | -1.96   | 0.0519  |
| Genotype*Dose                      |     | CG       | 0.1  |     | DM       | 6    | 71.2709  | 50.3836        | 175 | 1.41    | 0.1590  |
| Genotype*Dose                      |     | CG       | 0.1  |     | DM       | 0    | 40.6396  | 50.1649        | 172 | 0.81    | 0.4190  |
| Genotype*Dose                      |     | CG       | 0.1  |     | RY       | 0.1  | -17.2722 | 50.2480        | 173 | -0.34   | 0.7315  |
| Genotype*Dose                      |     | CG       | 0.1  |     | RY       | 1    | -41.8199 | 50.1717        | 172 | -0.83   | 0.4057  |
| Genotype*Dose                      |     | CG       | 0.1  |     | RY       | 6    | 38.9937  | 50.4055        | 175 | 0.77    | 0.4402  |
| Genotype*Dose                      |     | CG       | 0.1  |     | RY       | 0    | 69.2654  | 50.2063        | 172 | 1.38    | 0.1695  |
| Genotype*Dose                      |     | CG       | 0.1  |     | WT       | 0.1  | 11.5348  | 50.2063        | 172 | 0.23    | 0.8186  |
| Genotype*Dose                      |     | CG       | 0.1  |     | WT       | 1    | 20.7792  | 50.3629        | 174 | 0.41    | 0.6804  |

*Mixed Effects Model for dendrite length sum**The Mixed Procedure*

| Differences of Least Squares Means |     |          |      |     |          |      |          |                |     |         |         |
|------------------------------------|-----|----------|------|-----|----------|------|----------|----------------|-----|---------|---------|
| Effect                             | Sex | Genotype | Dose | Sex | Genotype | Dose | Estimate | Standard Error | DF  | t Value | Pr >  t |
| Genotype*Dose                      |     | CG       | 0.1  |     | WT       | 6    | -10.7527 | 50.2480        | 173 | -0.21   | 0.8308  |
| Genotype*Dose                      |     | CG       | 0.1  |     | WT       | 0    | 63.5413  | 50.2063        | 172 | 1.27    | 0.2074  |
| Genotype*Dose                      |     | CG       | 1    |     | CG       | 6    | 103.04   | 50.2893        | 173 | 2.05    | 0.0420  |
| Genotype*Dose                      |     | CG       | 1    |     | CG       | 0    | -37.9621 | 50.2063        | 172 | -0.76   | 0.4506  |
| Genotype*Dose                      |     | CG       | 1    |     | DM       | 0.1  | 83.0897  | 50.2477        | 173 | 1.65    | 0.1000  |
| Genotype*Dose                      |     | CG       | 1    |     | DM       | 1    | -71.7042 | 50.2477        | 173 | -1.43   | 0.1554  |
| Genotype*Dose                      |     | CG       | 1    |     | DM       | 6    | 97.8443  | 50.4248        | 175 | 1.94    | 0.0539  |
| Genotype*Dose                      |     | CG       | 1    |     | DM       | 0    | 67.2129  | 50.2063        | 172 | 1.34    | 0.1824  |
| Genotype*Dose                      |     | CG       | 1    |     | RY       | 0.1  | 9.3012   | 50.2893        | 173 | 0.18    | 0.8535  |
| Genotype*Dose                      |     | CG       | 1    |     | RY       | 1    | -15.2466 | 50.2131        | 172 | -0.30   | 0.7618  |
| Genotype*Dose                      |     | CG       | 1    |     | RY       | 6    | 65.5671  | 50.4468        | 175 | 1.30    | 0.1954  |
| Genotype*Dose                      |     | CG       | 1    |     | RY       | 0    | 95.8388  | 50.2477        | 173 | 1.91    | 0.0581  |
| Genotype*Dose                      |     | CG       | 1    |     | WT       | 0.1  | 38.1082  | 50.2477        | 173 | 0.76    | 0.4492  |
| Genotype*Dose                      |     | CG       | 1    |     | WT       | 1    | 47.3525  | 50.4041        | 175 | 0.94    | 0.3488  |
| Genotype*Dose                      |     | CG       | 1    |     | WT       | 6    | 15.8207  | 50.2893        | 173 | 0.31    | 0.7534  |
| Genotype*Dose                      |     | CG       | 1    |     | WT       | 0    | 90.1146  | 50.2477        | 173 | 1.79    | 0.0747  |
| Genotype*Dose                      |     | CG       | 6    |     | CG       | 0    | -141.00  | 50.2480        | 173 | -2.81   | 0.0056  |
| Genotype*Dose                      |     | CG       | 6    |     | DM       | 0.1  | -19.9509 | 50.2893        | 173 | -0.40   | 0.6921  |
| Genotype*Dose                      |     | CG       | 6    |     | DM       | 1    | -174.74  | 50.2893        | 173 | -3.47   | 0.0006  |
| Genotype*Dose                      |     | CG       | 6    |     | DM       | 6    | -5.1964  | 50.4662        | 176 | -0.10   | 0.9181  |
| Genotype*Dose                      |     | CG       | 6    |     | DM       | 0    | -35.8277 | 50.2480        | 173 | -0.71   | 0.4768  |
| Genotype*Dose                      |     | CG       | 6    |     | RY       | 0.1  | -93.7395 | 50.3309        | 174 | -1.86   | 0.0642  |
| Genotype*Dose                      |     | CG       | 6    |     | RY       | 1    | -118.29  | 50.2547        | 173 | -2.35   | 0.0197  |
| Genotype*Dose                      |     | CG       | 6    |     | RY       | 6    | -37.4736 | 50.4881        | 176 | -0.74   | 0.4589  |
| Genotype*Dose                      |     | CG       | 6    |     | RY       | 0    | -7.2019  | 50.2893        | 173 | -0.14   | 0.8863  |
| Genotype*Dose                      |     | CG       | 6    |     | WT       | 0.1  | -64.9325 | 50.2893        | 173 | -1.29   | 0.1984  |
| Genotype*Dose                      |     | CG       | 6    |     | WT       | 1    | -55.6882 | 50.4456        | 175 | -1.10   | 0.2711  |
| Genotype*Dose                      |     | CG       | 6    |     | WT       | 6    | -87.2200 | 50.3309        | 174 | -1.73   | 0.0849  |
| Genotype*Dose                      |     | CG       | 6    |     | WT       | 0    | -12.9260 | 50.2893        | 173 | -0.26   | 0.7975  |
| Genotype*Dose                      |     | CG       | 0    |     | DM       | 0.1  | 121.05   | 50.2063        | 172 | 2.41    | 0.0170  |
| Genotype*Dose                      |     | CG       | 0    |     | DM       | 1    | -33.7421 | 50.2063        | 172 | -0.67   | 0.5024  |
| Genotype*Dose                      |     | CG       | 0    |     | DM       | 6    | 135.81   | 50.3836        | 175 | 2.70    | 0.0077  |

*Mixed Effects Model for dendrite length sum**The Mixed Procedure*

| Differences of Least Squares Means |     |          |      |     |          |      |          |                |     |         |         |
|------------------------------------|-----|----------|------|-----|----------|------|----------|----------------|-----|---------|---------|
| Effect                             | Sex | Genotype | Dose | Sex | Genotype | Dose | Estimate | Standard Error | DF  | t Value | Pr >  t |
| Genotype*Dose                      |     | CG       | 0    |     | DM       | 0    | 105.17   | 50.1649        | 172 | 2.10    | 0.0375  |
| Genotype*Dose                      |     | CG       | 0    |     | RY       | 0.1  | 47.2632  | 50.2480        | 173 | 0.94    | 0.3482  |
| Genotype*Dose                      |     | CG       | 0    |     | RY       | 1    | 22.7155  | 50.1717        | 172 | 0.45    | 0.6513  |
| Genotype*Dose                      |     | CG       | 0    |     | RY       | 6    | 103.53   | 50.4055        | 175 | 2.05    | 0.0415  |
| Genotype*Dose                      |     | CG       | 0    |     | RY       | 0    | 133.80   | 50.2063        | 172 | 2.67    | 0.0084  |
| Genotype*Dose                      |     | CG       | 0    |     | WT       | 0.1  | 76.0702  | 50.2063        | 172 | 1.52    | 0.1316  |
| Genotype*Dose                      |     | CG       | 0    |     | WT       | 1    | 85.3146  | 50.3629        | 174 | 1.69    | 0.0921  |
| Genotype*Dose                      |     | CG       | 0    |     | WT       | 6    | 53.7827  | 50.2480        | 173 | 1.07    | 0.2860  |
| Genotype*Dose                      |     | CG       | 0    |     | WT       | 0    | 128.08   | 50.2063        | 172 | 2.55    | 0.0116  |
| Genotype*Dose                      |     | DM       | 0.1  |     | DM       | 1    | -154.79  | 50.2477        | 173 | -3.08   | 0.0024  |
| Genotype*Dose                      |     | DM       | 0.1  |     | DM       | 6    | 14.7545  | 50.4248        | 175 | 0.29    | 0.7702  |
| Genotype*Dose                      |     | DM       | 0.1  |     | DM       | 0    | -15.8768 | 50.2063        | 172 | -0.32   | 0.7522  |
| Genotype*Dose                      |     | DM       | 0.1  |     | RY       | 0.1  | -73.7886 | 50.2893        | 173 | -1.47   | 0.1441  |
| Genotype*Dose                      |     | DM       | 0.1  |     | RY       | 1    | -98.3363 | 50.2131        | 172 | -1.96   | 0.0518  |
| Genotype*Dose                      |     | DM       | 0.1  |     | RY       | 6    | -17.5227 | 50.4466        | 175 | -0.35   | 0.7287  |
| Genotype*Dose                      |     | DM       | 0.1  |     | RY       | 0    | 12.7490  | 50.2477        | 173 | 0.25    | 0.8000  |
| Genotype*Dose                      |     | DM       | 0.1  |     | WT       | 0.1  | -44.9816 | 50.2477        | 173 | -0.90   | 0.3719  |
| Genotype*Dose                      |     | DM       | 0.1  |     | WT       | 1    | -35.7372 | 50.4042        | 175 | -0.71   | 0.4793  |
| Genotype*Dose                      |     | DM       | 0.1  |     | WT       | 6    | -67.2691 | 50.2893        | 173 | -1.34   | 0.1828  |
| Genotype*Dose                      |     | DM       | 0.1  |     | WT       | 0    | 7.0249   | 50.2477        | 173 | 0.14    | 0.8890  |
| Genotype*Dose                      |     | DM       | 1    |     | DM       | 6    | 169.55   | 50.4248        | 175 | 3.36    | 0.0009  |
| Genotype*Dose                      |     | DM       | 1    |     | DM       | 0    | 138.92   | 50.2063        | 172 | 2.77    | 0.0063  |
| Genotype*Dose                      |     | DM       | 1    |     | RY       | 0.1  | 81.0054  | 50.2893        | 173 | 1.61    | 0.1090  |
| Genotype*Dose                      |     | DM       | 1    |     | RY       | 1    | 56.4576  | 50.2131        | 172 | 1.12    | 0.2624  |
| Genotype*Dose                      |     | DM       | 1    |     | RY       | 6    | 137.27   | 50.4466        | 175 | 2.72    | 0.0072  |
| Genotype*Dose                      |     | DM       | 1    |     | RY       | 0    | 167.54   | 50.2477        | 173 | 3.33    | 0.0010  |
| Genotype*Dose                      |     | DM       | 1    |     | WT       | 0.1  | 109.81   | 50.2477        | 173 | 2.19    | 0.0302  |
| Genotype*Dose                      |     | DM       | 1    |     | WT       | 1    | 119.06   | 50.4042        | 175 | 2.36    | 0.0193  |
| Genotype*Dose                      |     | DM       | 1    |     | WT       | 6    | 87.5249  | 50.2893        | 173 | 1.74    | 0.0836  |
| Genotype*Dose                      |     | DM       | 1    |     | WT       | 0    | 161.82   | 50.2477        | 173 | 3.22    | 0.0015  |
| Genotype*Dose                      |     | DM       | 6    |     | DM       | 0    | -30.6313 | 50.3836        | 175 | -0.61   | 0.5440  |
| Genotype*Dose                      |     | DM       | 6    |     | RY       | 0.1  | -88.5431 | 50.4662        | 176 | -1.75   | 0.0811  |

*Mixed Effects Model for dendrite length sum**The Mixed Procedure*

| Differences of Least Squares Means |     |          |      |     |          |      |          |                |     |         |         |
|------------------------------------|-----|----------|------|-----|----------|------|----------|----------------|-----|---------|---------|
| Effect                             | Sex | Genotype | Dose | Sex | Genotype | Dose | Estimate | Standard Error | DF  | t Value | Pr >  t |
| Genotype*Dose                      |     | DM       | 6    |     | RY       | 1    | -113.09  | 50.3903        | 175 | -2.24   | 0.0261  |
| Genotype*Dose                      |     | DM       | 6    |     | RY       | 6    | -32.2772 | 50.6232        | 178 | -0.64   | 0.5246  |
| Genotype*Dose                      |     | DM       | 6    |     | RY       | 0    | -2.0055  | 50.4248        | 175 | -0.04   | 0.9683  |
| Genotype*Dose                      |     | DM       | 6    |     | WT       | 0.1  | -59.7361 | 50.4248        | 175 | -1.18   | 0.2378  |
| Genotype*Dose                      |     | DM       | 6    |     | WT       | 1    | -50.4918 | 50.5806        | 177 | -1.00   | 0.3195  |
| Genotype*Dose                      |     | DM       | 6    |     | WT       | 6    | -82.0236 | 50.4662        | 176 | -1.63   | 0.1059  |
| Genotype*Dose                      |     | DM       | 6    |     | WT       | 0    | -7.7297  | 50.4248        | 175 | -0.15   | 0.8783  |
| Genotype*Dose                      |     | DM       | 0    |     | RY       | 0.1  | -57.9118 | 50.2480        | 173 | -1.15   | 0.2507  |
| Genotype*Dose                      |     | DM       | 0    |     | RY       | 1    | -82.4595 | 50.1717        | 172 | -1.64   | 0.1021  |
| Genotype*Dose                      |     | DM       | 0    |     | RY       | 6    | -1.6459  | 50.4055        | 175 | -0.03   | 0.9740  |
| Genotype*Dose                      |     | DM       | 0    |     | RY       | 0    | 28.6258  | 50.2063        | 172 | 0.57    | 0.5693  |
| Genotype*Dose                      |     | DM       | 0    |     | WT       | 0.1  | -29.1048 | 50.2063        | 172 | -0.58   | 0.5629  |
| Genotype*Dose                      |     | DM       | 0    |     | WT       | 1    | -19.8604 | 50.3629        | 174 | -0.39   | 0.6938  |
| Genotype*Dose                      |     | DM       | 0    |     | WT       | 6    | -51.3923 | 50.2480        | 173 | -1.02   | 0.3078  |
| Genotype*Dose                      |     | DM       | 0    |     | WT       | 0    | 22.9017  | 50.2063        | 172 | 0.46    | 0.6489  |
| Genotype*Dose                      |     | RY       | 0.1  |     | RY       | 1    | -24.5477 | 50.2547        | 173 | -0.49   | 0.6258  |
| Genotype*Dose                      |     | RY       | 0.1  |     | RY       | 6    | 56.2659  | 50.4881        | 176 | 1.11    | 0.2666  |
| Genotype*Dose                      |     | RY       | 0.1  |     | RY       | 0    | 86.5376  | 50.2893        | 173 | 1.72    | 0.0871  |
| Genotype*Dose                      |     | RY       | 0.1  |     | WT       | 0.1  | 28.8070  | 50.2893        | 173 | 0.57    | 0.5675  |
| Genotype*Dose                      |     | RY       | 0.1  |     | WT       | 1    | 38.0514  | 50.4456        | 175 | 0.75    | 0.4517  |
| Genotype*Dose                      |     | RY       | 0.1  |     | WT       | 6    | 6.5195   | 50.3309        | 174 | 0.13    | 0.8971  |
| Genotype*Dose                      |     | RY       | 0.1  |     | WT       | 0    | 80.8135  | 50.2893        | 173 | 1.61    | 0.1099  |
| Genotype*Dose                      |     | RY       | 1    |     | RY       | 6    | 80.8137  | 50.4122        | 175 | 1.60    | 0.1107  |
| Genotype*Dose                      |     | RY       | 1    |     | RY       | 0    | 111.09   | 50.2131        | 172 | 2.21    | 0.0283  |
| Genotype*Dose                      |     | RY       | 1    |     | WT       | 0.1  | 53.3548  | 50.2131        | 172 | 1.06    | 0.2895  |
| Genotype*Dose                      |     | RY       | 1    |     | WT       | 1    | 62.5991  | 50.3696        | 174 | 1.24    | 0.2156  |
| Genotype*Dose                      |     | RY       | 1    |     | WT       | 6    | 31.0673  | 50.2547        | 173 | 0.62    | 0.5373  |
| Genotype*Dose                      |     | RY       | 1    |     | WT       | 0    | 105.36   | 50.2131        | 172 | 2.10    | 0.0373  |
| Genotype*Dose                      |     | RY       | 6    |     | RY       | 0    | 30.2717  | 50.4468        | 175 | 0.60    | 0.5492  |
| Genotype*Dose                      |     | RY       | 6    |     | WT       | 0.1  | -27.4589 | 50.4468        | 175 | -0.54   | 0.5869  |
| Genotype*Dose                      |     | RY       | 6    |     | WT       | 1    | -18.2146 | 50.6027        | 177 | -0.36   | 0.7193  |
| Genotype*Dose                      |     | RY       | 6    |     | WT       | 6    | -49.7464 | 50.4881        | 176 | -0.99   | 0.3258  |

*Mixed Effects Model for dendrite length sum**The Mixed Procedure*

| Differences of Least Squares Means |     |          |      |     |          |      |          |                |     |         |         |
|------------------------------------|-----|----------|------|-----|----------|------|----------|----------------|-----|---------|---------|
| Effect                             | Sex | Genotype | Dose | Sex | Genotype | Dose | Estimate | Standard Error | DF  | t Value | Pr >  t |
| Genotype*Dose                      |     | RY       | 6    |     | WT       | 0    | 24.5475  | 50.4466        | 175 | 0.49    | 0.6271  |
| Genotype*Dose                      |     | RY       | 0    |     | WT       | 0.1  | -57.7306 | 50.2477        | 173 | -1.15   | 0.2522  |
| Genotype*Dose                      |     | RY       | 0    |     | WT       | 1    | -48.4862 | 50.4041        | 175 | -0.96   | 0.3374  |
| Genotype*Dose                      |     | RY       | 0    |     | WT       | 6    | -80.0181 | 50.2893        | 173 | -1.59   | 0.1134  |
| Genotype*Dose                      |     | RY       | 0    |     | WT       | 0    | -5.7241  | 50.2477        | 173 | -0.11   | 0.9094  |
| Genotype*Dose                      |     | WT       | 0.1  |     | WT       | 1    | 9.2443   | 50.4041        | 175 | 0.18    | 0.8547  |
| Genotype*Dose                      |     | WT       | 0.1  |     | WT       | 6    | -22.2875 | 50.2893        | 173 | -0.44   | 0.6582  |
| Genotype*Dose                      |     | WT       | 0.1  |     | WT       | 0    | 52.0065  | 50.2477        | 173 | 1.04    | 0.3021  |
| Genotype*Dose                      |     | WT       | 1    |     | WT       | 6    | -31.5318 | 50.4456        | 175 | -0.63   | 0.5327  |
| Genotype*Dose                      |     | WT       | 1    |     | WT       | 0    | 42.7621  | 50.4042        | 175 | 0.85    | 0.3974  |
| Genotype*Dose                      |     | WT       | 6    |     | WT       | 0    | 74.2940  | 50.2893        | 173 | 1.48    | 0.1414  |

**Mixed model for cell body area****The Mixed Procedure**

| Solution for Fixed Effects |     |          |      |          |                |     |         |         |       |          |         |
|----------------------------|-----|----------|------|----------|----------------|-----|---------|---------|-------|----------|---------|
| Effect                     | Sex | Genotype | Dose | Estimate | Standard Error | DF  | t Value | Pr >  t | Alpha | Lower    | Upper   |
| Intercept                  |     |          |      | 241.25   | 5.5007         | 182 | 43.86   | <.0001  | 0.05  | 230.40   | 252.10  |
| Sex                        | F   |          |      | 1.7592   | 3.8946         | 183 | 0.45    | 0.6520  | 0.05  | -5.9250  | 9.4433  |
| Sex                        | M   |          |      | 0        | .              | .   | .       | .       | .     | .        | .       |
| Genotype                   |     | CG       |      | 1.4624   | 5.5043         | 182 | 0.27    | 0.7908  | 0.05  | -9.3978  | 12.3226 |
| Genotype                   |     | DM       |      | -9.6562  | 5.5112         | 183 | -1.75   | 0.0814  | 0.05  | -20.5298 | 1.2173  |
| Genotype                   |     | RY       |      | -12.3720 | 5.5137         | 183 | -2.24   | 0.0260  | 0.05  | -23.2505 | -1.4935 |
| Genotype                   |     | WT       |      | 0        | .              | .   | .       | .       | .     | .        | .       |
| Dose                       |     |          | 0.1  | 14.7067  | 5.4950         | 181 | 2.68    | 0.0081  | 0.05  | 3.8643   | 25.5491 |
| Dose                       |     |          | 1    | 11.1504  | 5.4995         | 182 | 2.03    | 0.0441  | 0.05  | 0.2993   | 22.0015 |
| Dose                       |     |          | 6    | 8.5039   | 5.5130         | 184 | 1.54    | 0.1247  | 0.05  | -2.3731  | 19.3809 |
| Dose                       |     |          | 0    | 0        | .              | .   | .       | .       | .     | .        | .       |

| Type 3 Tests of Fixed Effects |        |        |         |        |
|-------------------------------|--------|--------|---------|--------|
| Effect                        | Num DF | Den DF | F Value | Pr > F |
| Sex                           | 1      | 183    | 0.20    | 0.6520 |
| Genotype                      | 3      | 183    | 3.14    | 0.0267 |
| Dose                          | 3      | 183    | 2.60    | 0.0536 |

| Least Squares Means |     |          |      |          |                |
|---------------------|-----|----------|------|----------|----------------|
| Effect              | Sex | Genotype | Dose | Estimate | Standard Error |
| Sex                 | F   |          |      | 246.46   | 2.7539         |
| Sex                 | M   |          |      | 244.70   | 2.7539         |
| Genotype            |     | CG       |      | 252.18   | 3.8856         |
| Genotype            |     | DM       |      | 241.06   | 3.8954         |
| Genotype            |     | RY       |      | 238.35   | 3.8990         |
| Genotype            |     | WT       |      | 250.72   | 3.8986         |
| Dose                |     |          | 0.1  | 251.69   | 3.8879         |
| Dose                |     |          | 1    | 248.14   | 3.8942         |

*Mixed model for cell body area**The Mixed Procedure*

| Least Squares Means |     |          |      |          |                |
|---------------------|-----|----------|------|----------|----------------|
| Effect              | Sex | Genotype | Dose | Estimate | Standard Error |
| Dose                |     |          | 6    | 245.49   | 3.9132         |
| Dose                |     |          | 0    | 236.99   | 3.8832         |

| Differences of Least Squares Means |     |          |      |     |          |      |          |                |     |         |         |
|------------------------------------|-----|----------|------|-----|----------|------|----------|----------------|-----|---------|---------|
| Effect                             | Sex | Genotype | Dose | Sex | Genotype | Dose | Estimate | Standard Error | DF  | t Value | Pr >  t |
| Sex                                | F   |          |      | M   |          |      | 1.7592   | 3.8946         | 183 | 0.45    | 0.6520  |
| Genotype                           |     | CG       |      |     | DM       |      | 11.1186  | 5.5020         | 182 | 2.02    | 0.0448  |
| Genotype                           |     | CG       |      |     | RY       |      | 13.8344  | 5.5045         | 182 | 2.51    | 0.0128  |
| Genotype                           |     | CG       |      |     | WT       |      | 1.4624   | 5.5043         | 182 | 0.27    | 0.7908  |
| Genotype                           |     | DM       |      |     | RY       |      | 2.7158   | 5.5114         | 183 | 0.49    | 0.6228  |
| Genotype                           |     | DM       |      |     | WT       |      | -9.6562  | 5.5112         | 183 | -1.75   | 0.0814  |
| Genotype                           |     | RY       |      |     | WT       |      | -12.3720 | 5.5137         | 183 | -2.24   | 0.0260  |
| Dose                               |     |          | 0.1  |     |          | 1    | 3.5563   | 5.5028         | 182 | 0.65    | 0.5189  |
| Dose                               |     |          | 0.1  |     |          | 6    | 6.2028   | 5.5163         | 184 | 1.12    | 0.2623  |
| Dose                               |     |          | 0.1  |     |          | 0    | 14.7067  | 5.4950         | 181 | 2.68    | 0.0081  |
| Dose                               |     |          | 1    |     |          | 6    | 2.6465   | 5.5208         | 184 | 0.48    | 0.6322  |
| Dose                               |     |          | 1    |     |          | 0    | 11.1504  | 5.4995         | 182 | 2.03    | 0.0441  |
| Dose                               |     |          | 6    |     |          | 0    | 8.5039   | 5.5130         | 184 | 1.54    | 0.1247  |

*Mixed model for tips per dendrite**The Mixed Procedure*

| Solution for Fixed Effects |     |          |      |          |                |     |         |         |       |          |         |
|----------------------------|-----|----------|------|----------|----------------|-----|---------|---------|-------|----------|---------|
| Effect                     | Sex | Genotype | Dose | Estimate | Standard Error | DF  | t Value | Pr >  t | Alpha | Lower    | Upper   |
| Intercept                  |     |          |      | 1.9491   | 0.03974        | 184 | 49.05   | <.0001  | 0.05  | 1.8707   | 2.0275  |
| Sex                        | F   |          |      | 0.03566  | 0.02815        | 185 | 1.27    | 0.2069  | 0.05  | -0.01988 | 0.09121 |
| Sex                        | M   |          |      | 0        | .              | .   | .       | .       | .     | .        | .       |
| Genotype                   |     | CG       |      | 0.04820  | 0.03977        | 185 | 1.21    | 0.2271  | 0.05  | -0.03027 | 0.1267  |
| Genotype                   |     | DM       |      | -0.01594 | 0.03986        | 186 | -0.40   | 0.6897  | 0.05  | -0.09457 | 0.06270 |
| Genotype                   |     | RY       |      | -0.01231 | 0.03988        | 186 | -0.31   | 0.7579  | 0.05  | -0.09100 | 0.06637 |
| Genotype                   |     | WT       |      | 0        | .              | .   | .       | .       | .     | .        | .       |
| Dose                       |     |          | 0.1  | -0.04131 | 0.03967        | 183 | -1.04   | 0.2990  | 0.05  | -0.1196  | 0.03695 |
| Dose                       |     |          | 1    | 0.03790  | 0.03971        | 184 | 0.95    | 0.3412  | 0.05  | -0.04046 | 0.1162  |
| Dose                       |     |          | 6    | -0.05027 | 0.03988        | 186 | -1.26   | 0.2091  | 0.05  | -0.1289  | 0.02841 |
| Dose                       |     |          | 0    | 0        | .              | .   | .       | .       | .     | .        | .       |

| Type 3 Tests of Fixed Effects |        |        |         |        |
|-------------------------------|--------|--------|---------|--------|
| Effect                        | Num DF | Den DF | F Value | Pr > F |
| Sex                           | 1      | 185    | 1.60    | 0.2069 |
| Genotype                      | 3      | 185    | 1.11    | 0.3459 |
| Dose                          | 3      | 185    | 2.08    | 0.1050 |

| Least Squares Means |     |          |      |          |                |
|---------------------|-----|----------|------|----------|----------------|
| Effect              | Sex | Genotype | Dose | Estimate | Standard Error |
| Sex                 | F   |          |      | 1.9763   | 0.01991        |
| Sex                 | M   |          |      | 1.9406   | 0.01991        |
| Genotype            |     | CG       |      | 2.0017   | 0.02805        |
| Genotype            |     | DM       |      | 1.9375   | 0.02817        |
| Genotype            |     | RY       |      | 1.9412   | 0.02820        |
| Genotype            |     | WT       |      | 1.9535   | 0.02820        |
| Dose                |     |          | 0.1  | 1.9306   | 0.02808        |
| Dose                |     |          | 1    | 2.0098   | 0.02814        |

*Mixed model for tips per dendrite**The Mixed Procedure*

| Least Squares Means |     |          |      |          |                |
|---------------------|-----|----------|------|----------|----------------|
| Effect              | Sex | Genotype | Dose | Estimate | Standard Error |
| Dose                |     |          | 6    | 1.9216   | 0.02838        |
| Dose                |     |          | 0    | 1.9719   | 0.02802        |

| Differences of Least Squares Means |     |          |      |     |          |      |          |                |     |         |         |
|------------------------------------|-----|----------|------|-----|----------|------|----------|----------------|-----|---------|---------|
| Effect                             | Sex | Genotype | Dose | Sex | Genotype | Dose | Estimate | Standard Error | DF  | t Value | Pr >  t |
| Sex                                | F   |          |      | M   |          |      | 0.03566  | 0.02815        | 185 | 1.27    | 0.2069  |
| Genotype                           |     | CG       |      |     | DM       |      | 0.06414  | 0.03975        | 184 | 1.61    | 0.1083  |
| Genotype                           |     | CG       |      |     | RY       |      | 0.06052  | 0.03978        | 185 | 1.52    | 0.1299  |
| Genotype                           |     | CG       |      |     | WT       |      | 0.04820  | 0.03977        | 185 | 1.21    | 0.2271  |
| Genotype                           |     | DM       |      |     | RY       |      | -0.00362 | 0.03986        | 186 | -0.09   | 0.9276  |
| Genotype                           |     | DM       |      |     | WT       |      | -0.01594 | 0.03986        | 186 | -0.40   | 0.6897  |
| Genotype                           |     | RY       |      |     | WT       |      | -0.01231 | 0.03988        | 186 | -0.31   | 0.7579  |
| Dose                               |     |          | 0.1  |     |          | 1    | -0.07921 | 0.03975        | 184 | -1.99   | 0.0478  |
| Dose                               |     |          | 0.1  |     |          | 6    | 0.008953 | 0.03992        | 187 | 0.22    | 0.8228  |
| Dose                               |     |          | 0.1  |     |          | 0    | -0.04131 | 0.03967        | 183 | -1.04   | 0.2990  |
| Dose                               |     |          | 1    |     |          | 6    | 0.08816  | 0.03997        | 188 | 2.21    | 0.0286  |
| Dose                               |     |          | 1    |     |          | 0    | 0.03790  | 0.03971        | 184 | 0.95    | 0.3412  |
| Dose                               |     |          | 6    |     |          | 0    | -0.05027 | 0.03988        | 186 | -1.26   | 0.2091  |

*Mixed model for dendritic mean length**The Mixed Procedure*

| Solution for Fixed Effects |     |          |      |          |                |     |         |         |       |         |         |
|----------------------------|-----|----------|------|----------|----------------|-----|---------|---------|-------|---------|---------|
| Effect                     | Sex | Genotype | Dose | Estimate | Standard Error | DF  | t Value | Pr >  t | Alpha | Lower   | Upper   |
| Intercept                  |     |          |      | 104.20   | 3.5329         | 182 | 29.49   | <.0001  | 0.05  | 97.2269 | 111.17  |
| Sex                        | F   |          |      | 1.0544   | 2.5021         | 183 | 0.42    | 0.6740  | 0.05  | -3.8823 | 5.9911  |
| Sex                        | M   |          |      | 0        | .              | .   | .       | .       | .     | .       | .       |
| Genotype                   |     | CG       |      | 4.9347   | 3.5356         | 182 | 1.40    | 0.1645  | 0.05  | -2.0413 | 11.9107 |
| Genotype                   |     | DM       |      | 0.3581   | 3.5413         | 183 | 0.10    | 0.9196  | 0.05  | -6.6288 | 7.3449  |
| Genotype                   |     | RY       |      | -0.08195 | 3.5432         | 184 | -0.02   | 0.9816  | 0.05  | -7.0725 | 6.9086  |
| Genotype                   |     | WT       |      | 0        | .              | .   | .       | .       | .     | .       | .       |
| Dose                       |     |          | 0.1  | -0.4280  | 3.5283         | 181 | -0.12   | 0.9036  | 0.05  | -7.3898 | 6.5338  |
| Dose                       |     |          | 1    | 3.7995   | 3.5317         | 182 | 1.08    | 0.2834  | 0.05  | -3.1690 | 10.7679 |
| Dose                       |     |          | 6    | -2.3990  | 3.5428         | 184 | -0.68   | 0.4992  | 0.05  | -9.3887 | 4.5907  |
| Dose                       |     |          | 0    | 0        | .              | .   | .       | .       | .     | .       | .       |

| Type 3 Tests of Fixed Effects |        |        |         |        |
|-------------------------------|--------|--------|---------|--------|
| Effect                        | Num DF | Den DF | F Value | Pr > F |
| Sex                           | 1      | 183    | 0.18    | 0.6740 |
| Genotype                      | 3      | 183    | 0.95    | 0.4197 |
| Dose                          | 3      | 183    | 1.07    | 0.3639 |

| Least Squares Means |     |          |      |          |                |
|---------------------|-----|----------|------|----------|----------------|
| Effect              | Sex | Genotype | Dose | Estimate | Standard Error |
| Sex                 | F   |          |      | 106.80   | 1.7693         |
| Sex                 | M   |          |      | 105.74   | 1.7693         |
| Genotype            |     | CG       |      | 109.90   | 2.4949         |
| Genotype            |     | DM       |      | 105.33   | 2.5028         |
| Genotype            |     | RY       |      | 104.89   | 2.5055         |
| Genotype            |     | WT       |      | 104.97   | 2.5053         |
| Dose                |     |          | 0.1  | 105.60   | 2.4968         |
| Dose                |     |          | 1    | 109.83   | 2.5016         |

*Mixed model for dendritic mean length**The Mixed Procedure*

| Least Squares Means |     |          |      |          |                |
|---------------------|-----|----------|------|----------|----------------|
| Effect              | Sex | Genotype | Dose | Estimate | Standard Error |
| Dose                |     |          | 6    | 103.63   | 2.5172         |
| Dose                |     |          | 0    | 106.03   | 2.4930         |

| Differences of Least Squares Means |     |          |      |     |          |      |          |                |     |         |         |
|------------------------------------|-----|----------|------|-----|----------|------|----------|----------------|-----|---------|---------|
| Effect                             | Sex | Genotype | Dose | Sex | Genotype | Dose | Estimate | Standard Error | DF  | t Value | Pr >  t |
| Sex                                | F   |          |      | M   |          |      | 1.0544   | 2.5021         | 183 | 0.42    | 0.6740  |
| Genotype                           |     | CG       |      |     | DM       |      | 4.5766   | 3.5339         | 182 | 1.30    | 0.1969  |
| Genotype                           |     | CG       |      |     | RY       |      | 5.0166   | 3.5358         | 182 | 1.42    | 0.1577  |
| Genotype                           |     | CG       |      |     | WT       |      | 4.9347   | 3.5356         | 182 | 1.40    | 0.1645  |
| Genotype                           |     | DM       |      |     | RY       |      | 0.4400   | 3.5414         | 183 | 0.12    | 0.9012  |
| Genotype                           |     | DM       |      |     | WT       |      | 0.3581   | 3.5413         | 183 | 0.10    | 0.9196  |
| Genotype                           |     | RY       |      |     | WT       |      | -0.08195 | 3.5432         | 184 | -0.02   | 0.9816  |
| Dose                               |     |          | 0.1  |     |          | 1    | -4.2274  | 3.5344         | 182 | -1.20   | 0.2332  |
| Dose                               |     |          | 0.1  |     |          | 6    | 1.9710   | 3.5455         | 184 | 0.56    | 0.5789  |
| Dose                               |     |          | 0.1  |     |          | 0    | -0.4280  | 3.5283         | 181 | -0.12   | 0.9036  |
| Dose                               |     |          | 1    |     |          | 6    | 6.1985   | 3.5489         | 185 | 1.75    | 0.0824  |
| Dose                               |     |          | 1    |     |          | 0    | 3.7995   | 3.5317         | 182 | 1.08    | 0.2834  |
| Dose                               |     |          | 6    |     |          | 0    | -2.3990  | 3.5428         | 184 | -0.68   | 0.4992  |

**Mixed model for Nodes****The Mixed Procedure**

| Solution for Fixed Effects |     |          |      |          |                |     |         |         |       |          |        |
|----------------------------|-----|----------|------|----------|----------------|-----|---------|---------|-------|----------|--------|
| Effect                     | Sex | Genotype | Dose | Estimate | Standard Error | DF  | t Value | Pr >  t | Alpha | Lower    | Upper  |
| Intercept                  |     |          |      | 5.2337   | 0.2382         | 183 | 21.97   | <.0001  | 0.05  | 4.7638   | 5.7036 |
| Sex                        | F   |          |      | 0.2403   | 0.1686         | 184 | 1.42    | 0.1559  | 0.05  | -0.09246 | 0.5730 |
| Sex                        | M   |          |      | 0        | .              | .   | .       | .       | .     | .        | .      |
| Genotype                   |     | CG       |      | 0.2296   | 0.2383         | 183 | 0.96    | 0.3367  | 0.05  | -0.2406  | 0.6998 |
| Genotype                   |     | DM       |      | -0.06773 | 0.2386         | 184 | -0.28   | 0.7769  | 0.05  | -0.5386  | 0.4031 |
| Genotype                   |     | RY       |      | 0.04704  | 0.2388         | 184 | 0.20    | 0.8440  | 0.05  | -0.4240  | 0.5181 |
| Genotype                   |     | WT       |      | 0        | .              | .   | .       | .       | .     | .        | .      |
| Dose                       |     |          | 0.1  | -0.1305  | 0.2379         | 182 | -0.55   | 0.5840  | 0.05  | -0.5999  | 0.3389 |
| Dose                       |     |          | 1    | 0.5842   | 0.2381         | 182 | 2.45    | 0.0151  | 0.05  | 0.1143   | 1.0540 |
| Dose                       |     |          | 6    | -0.2769  | 0.2387         | 184 | -1.16   | 0.2475  | 0.05  | -0.7479  | 0.1940 |
| Dose                       |     |          | 0    | 0        | .              | .   | .       | .       | .     | .        | .      |

| Type 3 Tests of Fixed Effects |        |        |         |        |
|-------------------------------|--------|--------|---------|--------|
| Effect                        | Num DF | Den DF | F Value | Pr > F |
| Sex                           | 1      | 184    | 2.03    | 0.1559 |
| Genotype                      | 3      | 184    | 0.57    | 0.6346 |
| Dose                          | 3      | 184    | 5.00    | 0.0024 |

| Least Squares Means |     |          |      |          |                |
|---------------------|-----|----------|------|----------|----------------|
| Effect              | Sex | Genotype | Dose | Estimate | Standard Error |
| Sex                 | F   |          |      | 5.5703   | 0.1192         |
| Sex                 | M   |          |      | 5.3301   | 0.1192         |
| Genotype            |     | CG       |      | 5.6276   | 0.1682         |
| Genotype            |     | DM       |      | 5.3303   | 0.1687         |
| Genotype            |     | RY       |      | 5.4450   | 0.1688         |
| Genotype            |     | WT       |      | 5.3980   | 0.1688         |
| Dose                |     |          | 0.1  | 5.2755   | 0.1683         |
| Dose                |     |          | 1    | 5.9902   | 0.1686         |

*Mixed model for Nodes**The Mixed Procedure*

| Least Squares Means |     |          |      |          |                |
|---------------------|-----|----------|------|----------|----------------|
| Effect              | Sex | Genotype | Dose | Estimate | Standard Error |
| Dose                |     |          | 6    | 5.1291   | 0.1695         |
| Dose                |     |          | 0    | 5.4060   | 0.1681         |

| Differences of Least Squares Means |     |          |      |     |          |      |          |                |     |         |         |
|------------------------------------|-----|----------|------|-----|----------|------|----------|----------------|-----|---------|---------|
| Effect                             | Sex | Genotype | Dose | Sex | Genotype | Dose | Estimate | Standard Error | DF  | t Value | Pr >  t |
| Sex                                | F   |          |      | M   |          |      | 0.2403   | 0.1686         | 184 | 1.42    | 0.1559  |
| Genotype                           |     | CG       |      |     | DM       |      | 0.2973   | 0.2382         | 183 | 1.25    | 0.2136  |
| Genotype                           |     | CG       |      |     | RY       |      | 0.1825   | 0.2383         | 183 | 0.77    | 0.4447  |
| Genotype                           |     | CG       |      |     | WT       |      | 0.2296   | 0.2383         | 183 | 0.96    | 0.3367  |
| Genotype                           |     | DM       |      |     | RY       |      | -0.1148  | 0.2386         | 184 | -0.48   | 0.6311  |
| Genotype                           |     | DM       |      |     | WT       |      | -0.06773 | 0.2386         | 184 | -0.28   | 0.7769  |
| Genotype                           |     | RY       |      |     | WT       |      | 0.04704  | 0.2388         | 184 | 0.20    | 0.8440  |
| Dose                               |     |          | 0.1  |     |          | 1    | -0.7147  | 0.2383         | 183 | -3.00   | 0.0031  |
| Dose                               |     |          | 0.1  |     |          | 6    | 0.1464   | 0.2389         | 185 | 0.61    | 0.5406  |
| Dose                               |     |          | 0.1  |     |          | 0    | -0.1305  | 0.2379         | 182 | -0.55   | 0.5840  |
| Dose                               |     |          | 1    |     |          | 6    | 0.8611   | 0.2391         | 185 | 3.60    | 0.0004  |
| Dose                               |     |          | 1    |     |          | 0    | 0.5842   | 0.2381         | 182 | 2.45    | 0.0151  |
| Dose                               |     |          | 6    |     |          | 0    | -0.2769  | 0.2387         | 184 | -1.16   | 0.2475  |
